# Supplementary material
Source: Research Square preprint supplement (doi:10.21203/rs.3.rs-8668774/v1)
Supplement: Supplementary file 1 [file 5be0956f831c3d61bfc17aaa.docx]

**Supplementary Material**

| 1. Name of Medical School |
| --- |
| 1. Year of Medical School |
| 1. Are you aware if you have to take the UKMLA during your medical studies? |
| 1. What would you rate your understanding of the UKMLA assessment post-session? |
| 1. What year of medical school will you sit the UKMLA exam? |
| 1. How would you rate your confidence of passing the UKMLA pre-session? |
| 1. How would you rate your preparedness for passing the UKMLA pre-session? |
| 1. How would you rate your anxiety for passing the UKMLA pre-session? |
| 1. How would you rate your motivation for attending UKMLA focused events pre-session? |
| 1. How would you rate your overall knowledge for the UKMLA pre-session? |
| 1. How would you rate your topic specific knowledge for the UKMLA pre-session? |
| 1. What are some significant gaps you have identified in your knowledge in preparing for the UKMLA pre-session? |
| 1. How do you feel taking the UKMLA pre-session? |

Supplementary Table 1: Pre-intervention questionnaire items

| 1. Name of Medical School |
| --- |
| 1. Year of Medical School |
| 1. Are you aware if you have to take the UKMLA during your medical studies? |
| 1. What would you rate your understanding of the UKMLA assessment post-session? |
| 1. What year of medical school will you sit the UKMLA exam? |
| 1. How would you rate your confidence of passing the UKMLA post-session? |
| 1. How would you rate your preparedness for passing the UKMLA post-session? |
| 1. How would you rate your anxiety for passing the UKMLA post-session? |
| 1. How would you rate your motivation for attending UKMLA focused events post-session? |
| 1. How would you rate your overall knowledge for the UKMLA post-session? |
| 1. How would you rate your topic specific knowledge for the UKMLA post-session? |
| 1. What are some significant gaps you have identified in your knowledge in preparing for the UKMLA post-session? |
| 1. How do you feel taking the UKMLA post-session? |

Supplementary Table 2: Post-intervention questionnaire items
