# Supplementary material
Source: Research Square preprint supplement (doi:10.21203/rs.3.rs-8668774/v1)
Supplement: Supplementary file 2 [file bbf65b06a4d4a5394653fd5d.xlsx]

## Sheet: Overview
	Pre-session form:	Post-session form:
Cardiology 1	https://forms.gle/ND4YCmf2gWYH47T37	https://forms.gle/mZgZg2WJ7RtQp1Z89
Cardiology 2	https://forms.gle/wVY5j8QVhRG1gCnn9	https://forms.gle/w36AH7Cx8bRz8dVPA
Respiratory 2	https://forms.gle/5ugVwL7Nq3jBXFVv8	https://forms.gle/kPm5gUa73JHqYnN5A
Gastroenterology 1	https://forms.gle/eEWwYC4SgTbqRnV87	https://forms.gle/3i3J3sWiKKgHN5bN8
Gastroenterology 2	https://forms.gle/9hmpF4zqEhTbS6R58	https://forms.gle/V9BZn3d2jubCR79h8
Hepatology	https://forms.gle/ochyYUNmt774xE736	https://forms.gle/vM8yrvneXDg1zQT57
Psychiatry	https://forms.gle/4GNgEFoiLTMxmAPS7	https://forms.gle/QtbXWUCzkGKvozbh8
Respiratory 1	https://forms.gle/MR6ZFfFu9RnsSRm2A	https://forms.gle/7aUuqEBf8rsWmf6d6
Neurology 1	https://forms.gle/vwLZde6qHgRQmXkG8	https://forms.gle/sNVLyGcBLAjPK2ia7
Neurology 2	https://forms.gle/JfPfLiqmu5iPB2468	https://forms.gle/TK6cNsgKb26Km7V87
Paediatrics 1	https://forms.gle/eLvKxVMXWZ4k51NYA	https://forms.gle/VzLhBcurg2ajM4Xh7
Paediatrics 2	https://forms.gle/fueV6zEhEX1AaV3B8	https://forms.gle/1hTB9CEuoX5PB2fz7
Obstetrics	https://forms.gle/QfYuf67T5A7HLh7e9	https://forms.gle/ky8H8fAMSTxutTVQ8
Gynaecology	https://forms.gle/7hY7dq4bLUfBykri8	https://forms.gle/3dYhpmSQX7qP3LBK9
Genitourinary (e.g. STIs)	https://forms.gle/j1fBr4S62CD2S14i6	https://forms.gle/1RsFvLYzz8i8XMrX6
Renal	https://forms.gle/gDTQnnaBAXgt2oBi9	https://forms.gle/wwUxCuC4mS4AvoRt8
Metabolic Medicine	https://forms.gle/2772YFerWNCjTrVj9	https://forms.gle/1VdwBSzdQKJ7ZuFM7
Endocrinology	https://forms.gle/cmk9QWYAMXZN3Cu39	https://forms.gle/e5yMxp2soGf7kwYZ9
Diabetes	https://forms.gle/K9YC9AZ8xF3pbH8T7	https://forms.gle/ovDefyEWh16YX7HK7
Ophthalmology	https://forms.gle/6mvkM2cCNwxeWwkc8	https://forms.gle/cK5gZ5xMeKHYpCi88
Rheumatology 1	https://forms.gle/UAJa6R7TC8Wkwan96	https://forms.gle/oS4tnqxPz6bvSa44A
Rheumatology 2	https://forms.gle/iLnc4ykcMba7HT7a8	https://forms.gle/CyyUzXSBJix1e2mc8
Dermatology	https://forms.gle/rzX3mXbA5i4nRjYXA	https://forms.gle/bA9dRrAHQS31toa19
Emergency Medicine & Anaesthesia	https://forms.gle/jpDku4fa9kbLqyNX9	https://forms.gle/Lv6LoRxyEYvAL1nR9
Oncology	https://forms.gle/absdffkn8BBwSKj79	https://forms.gle/qK1r5MFsrk3dMbGr7
Haematology 1	https://forms.gle/tWP2vTpHtke3Lr8JA	https://forms.gle/GYCoe22h9Uf7xbZT6
Haematology 2	https://forms.gle/s1HZCyx2PbosMXiX9	https://forms.gle/b8ubGpdszJKbrb6k6
Breast	https://forms.gle/NVuBiLgciDqB6VZ36	https://forms.gle/6phriMzQTYFgdrZD6
Medical Ethics / Population Health	https://forms.gle/imQHXBxvv51DpZkUA	https://forms.gle/xDoZmRGvByHTu8m36
UKMLA Crash Course 1	https://forms.gle/yFS8fRo4LX5oThBHA	https://forms.gle/NyhCmiG178SWqF8A6
UKMLA Crash Course 2	https://forms.gle/8yJzwzzqwPrXrXB59	https://forms.gle/copVrHhJrL5mpz1d6

## Sheet: Overall Pre
	Timestamp	Name of Medical School	Year of Medical School	Are you aware if you have to take the UKMLA during your medical studies?	What would you rate your understanding of the UKMLA assessment post-session?	What year of medical school will you sit the UKMLA exam?	How would you rate your confidence of passing the UKMLA pre-session?	How would you rate your preparedness for passing the UKMLA pre-session?	How would you rate your anxiety for passing the UKMLA pre-session?	How would you rate your motivation for attending UKMLA focused events pre-session?	How would you rate your overall knowledge for the UKMLA pre-session?	How would you rate your topic specific knowledge for the UKMLA pre-session?	What are some significant gaps you have identified in your knowledge in preparing for the UKMLA pre-session?	How do you feel taking the UKMLA pre-session?
Pre-oncology	2025/01/09 7:08:31 pm GMT	UoSouthampton	5	I am aware that I have to take the UKMLA during my medical studies	6	2024/2025	7	7	7	10	7	6	Leukaemia	Anxious little bit
Pre-dermatology	2024/12/10 6:51:38 pm GMT	UoSouthampton	5	I am aware that I have to take the UKMLA during my medical studies	6	2024/2025	6	6	10	10	6	5	Different treatments	Anxious
Pre-dermatology	2024/12/10 7:04:58 pm GMT	Leicester Medical School	5	I am aware that I have to take the UKMLA during my medical studies	5	2024/2025	5	5	5	5	5	5	everything	worried
Pre-dermatology	2024/12/10 7:32:07 pm GMT	Cardiff university	4	I am aware that I have to take the UKMLA during my medical studies	8	2025/2026	4	6	10	10	5	8	Dermatology	NA
Pre-rheumatology(1)	2024/12/03 7:01:03 pm GMT	University of Aberdeen	4	I am aware that I have to take the UKMLA during my medical studies	4	2024/2025	4	2	9	6	1	6	I've struggled with Rheum as I was never really taught it just bits here and there but I've been working on it in the lead up to this session to build my confidence	STRESSED
Pre-rheumatology(1)	2024/12/03 7:04:38 pm GMT	KCL	5	I am aware that I have to take the UKMLA during my medical studies	7	2024/2025	6	5	5	5	5	5	not 100% confident in all rheumat presentations yet	good for knowing where i stand
Pre-rheumatology(1)	2024/12/03 7:06:03 pm GMT	UMT	6	I am not aware if I have to / don't have to take the UKMLA during my medical studies	9	I am not sure	5	6	10	8	5	5	DDX	-
Pre-rheumatology(1)	2024/12/03 7:22:27 pm GMT	Cardiff	5	I am aware that I have to take the UKMLA during my medical studies	6	2024/2025	6	6	10	6	7	7	N/A	Not confident
Pre-rheumatology(1)	2024/12/03 7:26:20 pm GMT	Uni of glasgow	4	I am aware that I have to take the UKMLA during my medical studies	8	2025/2026	4	8	7	4	6	6	Diabetes & endocrinology & ethics	Okay
Pre-rheumatology(1)	2024/12/03 7:26:43 pm GMT	Leicester Medical School	5	I am aware that I have to take the UKMLA during my medical studies	5	2024/2025	5	5	10	0	5	5	knowing investigations	nervous
Pre-rheumatology(1)	2024/12/03 8:19:33 pm GMT	Cardiff	3	I am aware that I have to take the UKMLA during my medical studies	7	2026/2027	2	1	6	4	7	1	I was not aware of the types of vasculitis and their presentation and management.	I found the session a helpful revision/learning tool. It has helped me become more familiar with types of exam questions and identify gaps in my knowledge.
Pre-rheumatology(1)	2024/12/03 8:30:29 pm GMT	UoSouthampton	5	I am aware that I have to take the UKMLA during my medical studies	6	2024/2025	5	6	10	10	6	5	-	Panic
Pre-opthalmology	2024-11-28 19:35:37	Uni of Glasgow	4	I am aware that I have to take the UKMLA during my medical studies	8	2025/2026	9	8	7	7	5	7	Ophthalmology & diabetes	Nervous
Pre-opthalmology	2024-11-28 20:03:57	UoSouthampton	5	I am aware that I have to take the UKMLA during my medical studies	6	2024/2025	6	6	10	10	6	3	E	Anxious
Pre-diabetes	2024/11/26 7:06:41 pm GMT	Uni of Glasgow	4	I am aware that I have to take the UKMLA during my medical studies	6	2025/2026	6	8	5	3	8	9	Diabetes	Stressed
Pre-diabetes	2024/11/26 7:07:35 pm GMT	UMT	6	I am not aware if I have to / don't have to take the UKMLA during my medical studies	5	I am not sure	5	5	6	6	5	5	-	-
Pre-diabetes	2024/11/26 7:14:18 pm GMT	Ilia state university	4	I am not aware if I have to / don't have to take the UKMLA during my medical studies	3	N/A	5	3	6	8	4	3	Idk	Enthusiastic, looking for many sources to choose by the end of my medical year which journey I should be following..
Pre-diabetes	2024/11/26 7:22:07 pm GMT	UoSouthampton	5	I am aware that I have to take the UKMLA during my medical studies	6	2024/2025	6	5	10	10	5	5	-	-
Pre-endocrine	2024/11/21 7:15:34 pm GMT	UoSouthampton	5	I am aware that I have to take the UKMLA during my medical studies	7	2024/2025	6	6	10	10	6	4	-	Anxious
Pre-endocrine	2024/11/21 7:18:33 pm GMT	glasgow uni	4	I am aware that I have to take the UKMLA during my medical studies	7	2025/2026	7	7	9	9	7	5	endocrinology & repro stuff	stressed
Pre-endocrine	2024/11/21 7:32:56 pm GMT	NA		I am not aware if I have to / don't have to take the UKMLA during my medical studies	3	N/A	2	3	7	6	7	6	NA	NA
Pre-endocrine	2024/11/21 8:09:46 pm GMT	Uniceplac	6	I am aware that I have to take the UKMLA during my medical studies	10	2025/2026	4	4	4	4	4	4	Difficulties	Prepared
Pre-endocrine	2024/11/21 8:59:22 pm GMT	Zhejiang	6	I am aware that I do not have to take the UKMLA during my medical studies	8	N/A	9	8	7	8	7	7	Clinical cases	Great
Pre-metabolic	2024/11/19 7:15:21 pm GMT	Uni of glasgow	4	I am aware that I have to take the UKMLA during my medical studies	6	2025/2026	4	2	5	3	5	5	All metabolic medicine	Stressed
Pre-metabolic	2024/11/19 7:30:42 pm GMT	UoSouthampton	5	I am aware that I have to take the UKMLA during my medical studies	6	2024/2025	6	6	10	10	6	4	All of it	Anxious
Pre-renal	2024/11/14 7:19:43 pm GMT	Leicester Medical School	5	I am aware that I have to take the UKMLA during my medical studies	5	2024/2025	3	3	10	1	3	2	renal, haem, ophthom, surgery	worried
Pre-renal	2024/11/14 7:24:04 pm GMT	Glasgow uni	4	I am aware that I have to take the UKMLA during my medical studies	3	2025/2026	5	8	6	3	5	5	Lots of obstetrics	Scared
Pre-renal	2024/11/14 8:15:17 pm GMT	UoS	5	I am aware that I have to take the UKMLA during my medical studies	6	2024/2025	6	5	10	10	5	3	-	-
Pre-genitourinary	2024/11/12 7:04:29 pm GMT	uom	5	I am aware that I have to take the UKMLA during my medical studies	7	2024/2025	7	7	7	10	7	6	remembering management	good?
Pre-genitourinary	2024/11/12 7:09:10 pm GMT	Glasgow	4	I am aware that I have to take the UKMLA during my medical studies	4	2025/2026	5	5	9	8	5	4	Gynae	Scared
Pre-genitourinary	2024/11/12 7:53:47 pm GMT	UoSouthampton	5	I am aware that I have to take the UKMLA during my medical studies	7	2024/2025	6	7	10	10	6	5	-	-
Pre-gynaecology	2024/11/07 6:58:33 pm GMT	UoSouthampton	5	I am aware that I have to take the UKMLA during my medical studies	7	2024/2025	6	6	9	10	6	7	-	-
Pre-gynaecology	2024/11/07 7:00:14 pm GMT	st georges u of L	4	I am aware that I have to take the UKMLA during my medical studies	7	2025/2026	5	5	10	10	5	5	DDxs	anxious
Pre-gynaecology	2024/11/07 7:01:45 pm GMT	cardiff	4	I am aware that I have to take the UKMLA during my medical studies	0	2025/2026	0	0	7	8	0	4	neuro	unsure
Pre-gynaecology	2024/11/07 7:12:20 pm GMT	Glasgow	4	I am aware that I have to take the UKMLA during my medical studies	8	2025/2026	7	6	5	7	7	6	Gynaecology and obstetrics	Stressed
Pre-gynaecology	2024/11/07 7:38:00 pm GMT	Mansoura University	5	I am aware that I do not have to take the UKMLA during my medical studies	10	N/A	6	10	7	10	10	10	.	.
Pre-gynaecology	2024/11/07 7:45:02 pm GMT	USMLE	5	I am aware that I have to take the UKMLA during my medical studies	4	2024/2025	6	8	7	9	8	8	Statistics, particular details in NICE guidelines (especially regarding schedules and non-medical management)	Still worried, but the session was very informative and helpful, thank you!
Pre-gynaecology	2024/11/07 7:55:18 pm GMT	Norwich Medical School	4	I am aware that I have to take the UKMLA during my medical studies	6	2026/2027	5	5	7	6	5	4	First line investigation and treatment for some cases	Not really sure
Pre-gynaecology	2024/11/07 8:27:19 pm GMT	Cardiff	5	I am aware that I have to take the UKMLA during my medical studies	6	2024/2025	6	6	6	6	6	6	NICE guidelines (especially schedules, statistics and non-medical management plans)	Still stressed, but the session was very informative and helpful, thank you!
Pre-obstetrics	2024/11/05 7:10:17 pm GMT	Sust	6	I am aware that I have to take the UKMLA during my medical studies	2	2026/2027	1	2	2	2	2	3	No	O
Pre-obstetrics	2024/11/05 7:16:32 pm GMT	university of leeds	5	I am aware that I have to take the UKMLA during my medical studies	7	2024/2025	6	6	7	7	7	5	N/A	nervous
Pre-obstetrics	2024/11/05 7:39:02 pm GMT	Norwich	5	I am aware that I have to take the UKMLA during my medical studies	10	2024/2025	7	7	5	10	6	6	Management of various conditions in a stepwise way. How to differentiate between differentials	More confident about the written exam aspect than the OSCE aspect
Pre-obstetrics	2024/11/05 7:56:33 pm GMT	Cardiff University	2	I am aware that I have to take the UKMLA during my medical studies	4	2027/2028	0	0	10	6	0	0	pregnancy complications	awful
Pre-paediatrcs(1)	2024/10/29 7:05:23 pm GMT	University of Manchester	5	I am aware that I have to take the UKMLA during my medical studies	9	2025/2026	8	8	7	10	8	4	Paeds management of condition, paed rashes	Good session for me since paeds is my week area
Pre-paediatrcs(1)	2024/10/29 7:07:19 pm GMT	Cardiff	4	I am aware that I have to take the UKMLA during my medical studies	5	2025/2026	5	5	5	5	5	5
Pre-paediatrcs(1)	2024/10/29 7:07:55 pm GMT	hull York medical school	5	I am aware that I have to take the UKMLA during my medical studies	10	2025/2026	8	9	8	10	8	9	n.a	n.a
Pre-paediatrcs(1)	2024/10/29 7:09:11 pm GMT	University of Surrey		I am not aware if I have to / don't have to take the UKMLA during my medical studies	2	N/A	2	2	5	7	2	5	N/A	N/A
Pre-paediatrcs(1)	2024/10/29 7:12:24 pm GMT	UoSouthampton	5	I am aware that I have to take the UKMLA during my medical studies	6	2024/2025	7	7	10	10	6	8	-	Semi
Pre-paediatrcs(1)	2024/10/29 7:13:44 pm GMT	Cardiff	5	I am aware that I have to take the UKMLA during my medical studies	9	2024/2025	8	9	9	9	9	9	everything lol	n/a
Pre-paediatrcs(1)	2024/10/29 7:15:52 pm GMT	Uni of Glasgow	4	I am aware that I have to take the UKMLA during my medical studies	5	2025/2026	6	7	10	5	4	4	Cardiology and paeds	Stresssed
Pre-paediatrcs(1)	2024/10/29 8:23:37 pm GMT	Cardiff	4	I am aware that I have to take the UKMLA during my medical studies	6	2025/2026	6	6	10	6	4	4	Not sure	Good
Pre-paediatrcs(1)	2024/11/02 12:24:01 pm GMT	University of Buckingham	4	I am aware that I have to take the UKMLA during my medical studies	9	2024/2025	6	6	10	10	6	6	Differentiating the organisms for the respiratory conditions	Excited to fill in my gaps of knowledge
Pre-neurology(2)	2024/10/24 6:16:54 pm GMT	ST Georges U of L	4	I am aware that I have to take the UKMLA during my medical studies	5	2025/2026	5	5	10	10	6	4	Developing rapid differentials under pressure	very anxious
Pre-neurology(2)	2024/10/24 7:01:02 pm GMT	NKUA	6	I am aware that I do not have to take the UKMLA during my medical studies	8	I am not sure	8	8	7	9	8	8	EVERYTHING CRYSTAL CLEAR	I DO NOT HAVE TO I JUST ATTEND FOR MY OWN KNOWLEDGE
Pre-neurology(2)	2024/10/24 7:03:01 pm GMT	Glasgow	4	I am aware that I have to take the UKMLA during my medical studies	4	2025/2026	8	7	9	3	5	4	Cardio	Scared
Pre-neurology(2)	2024/10/24 7:18:21 pm GMT	HYMS	5	I am aware that I have to take the UKMLA during my medical studies	8	2025/2026	7	7	7	7	8	7	n.a	n.a
Pre-respiratory(1)	2024/10/20 4:00:03 pm GMT	St Georges U of L	4	I am aware that I have to take the UKMLA during my medical studies	6	2026/2027	5	5	10	10	5	6	[Rapid] DDxs for OSCE	Anxious
Pre-respiratory(1)	2024/10/20 4:01:46 pm GMT	AMA	1	I am aware that I have to take the UKMLA during my medical studies	6	2028/2029	7	7	7	7	7	7	Need to prep more	Anxious
Pre-respiratory(1)	2024/10/20 4:04:08 pm GMT	Ulster	4	I am aware that I have to take the UKMLA during my medical studies	6	2024/2025	5	6	9	8	6	5	Spirometery	Nervous
Pre-respiratory(1)	2024/10/20 4:05:21 pm GMT	The University of Manchester	5	I am aware that I have to take the UKMLA during my medical studies	2	2024/2025	2	2	10	5	2	2	How to interpret question stems/rubrics and approach questions in a manner that ensures that I correctly understand the task and that I donâ€™t waste time considering irrelevant MCQ options.	Very nervous!
Pre-respiratory(1)	2024/10/20 4:08:45 pm GMT	University of Nis		I am aware that I have to take the UKMLA during my medical studies	5	N/A	5	5	5	10	6	6	Key terms identified for each disease.	Good, to get equipped with knowledge needed for it.
Pre-respiratory(1)	2024/10/20 4:41:17 pm GMT	UoSojthampton	5	I am aware that I have to take the UKMLA during my medical studies	7	2024/2025	6	6	10	10	6	7	N/A	N/A
Pre-respiratory(1)	2024/10/20 5:27:26 pm GMT	Cardiff University	5	I am aware that I have to take the UKMLA during my medical studies	5	2024/2025	5	5	5	5	5	5	Physiology	Scared
Pre-psychiatry	2024-10-17 19:23:25	SGUL	4	I am aware that I have to take the UKMLA during my medical studies	8	2026/2027	5	5	10	10	5	4	DDxs	anxious
Pre-psychiatry	2024-10-17 19:29:22	leeds	5	I am aware that I have to take the UKMLA during my medical studies	7	2024/2025	7	5	8	9	6	5	all core conditions	nervous
Pre-psychiatry	2024-10-17 19:37:46	UoS	5	I am aware that I have to take the UKMLA during my medical studies	7	2024/2025	6	6	8	10	8	8	N/A	Anxious
Pre-psychiatry	2024-10-17 19:43:20	UTG SMAHS		I am not aware if I have to / don't have to take the UKMLA during my medical studies	5	I am not sure	5	5	5	5	5	5	Psychiatry topics	Not sure yet
Pre-psychiatry	2024-10-17 19:53:44	Uni of Glasgow	4	I am aware that I have to take the UKMLA during my medical studies	4	2025/2026	3	2	4	3	5	3	Too many to name	Stressed out
Pre-psychiatry	2024-10-17 20:24:27	Cardiff University	5	I am aware that I have to take the UKMLA during my medical studies	5	2024/2025	5	5	5	5	5	5	Pharmacy	Not good
Pre-psychiatry	2024-10-17 20:34:19	Keele	4	I am aware that I have to take the UKMLA during my medical studies	8	2024/2025	5	5	5	8	6	2	neurology, medications, endicrinology	Nervous but theres a lot of time to go!!
Pre-psychiatry	2024-10-17 21:39:51	UEA	4	I am aware that I have to take the UKMLA during my medical studies	4	2025/2026	5	5	6	4	4	4	drugs	lightly nervous
Pre-cardiology(1)	2024/09/24 6:07:29 pm GMT	cardiff	3	I am aware that I have to take the UKMLA during my medical studies	8	2026/2027	4	4	4	4	4	4	n/a	n/a
Pre-cardiology(1)	2024/09/24 6:07:43 pm GMT	uni of glasgow	4	I am aware that I have to take the UKMLA during my medical studies	6	2025/2026	3	2	8	8	5	2	cardio	stressed
Pre-cardiology(1)	2024/09/24 6:07:49 pm GMT	Cardiff University	3	I am aware that I have to take the UKMLA during my medical studies	6	2026/2027	0	0	10	10	0	0	Heart sounds	nervous
Pre-cardiology(1)	2024/09/24 6:08:04 pm GMT	Cardiff University	5	I am aware that I have to take the UKMLA during my medical studies	1	2024/2025	5	5	5	5	5	5	What it is and how it is taken	Uneasy - its too new
Pre-cardiology(1)	2024/09/24 6:08:12 pm GMT	university of east anglia	5	I am aware that I have to take the UKMLA during my medical studies	8	2024/2025	7	6	9	8	7	5	ecgs, murmurs	not too bad, will hopefully be similar to previous exams
Pre-cardiology(1)	2024/09/24 6:08:17 pm GMT	cardiff	5	I am aware that I have to take the UKMLA during my medical studies	5	2024/2025	5	4	10	10	4	2	dermatology / question style	anxiious
Pre-cardiology(1)	2024/09/24 6:08:23 pm GMT	University of Liverpool	5	I am aware that I have to take the UKMLA during my medical studies	10	2024/2025	7	7	7	7	7	7	Third year content- cardiology,respiratory, gastroenterology	Scared
Pre-cardiology(1)	2024/09/24 6:08:25 pm GMT	University of Cambridge	6	I am aware that I have to take the UKMLA during my medical studies	7	2024/2025	5	5	5	4	7	5	basic sciences	a bit nervous as its coming up soon
Pre-cardiology(1)	2024/09/24 6:08:26 pm GMT	Cardiff C21 North	5	I am aware that I have to take the UKMLA during my medical studies	6	2024/2025	5	5	9	9	7	6	Pharmacology	Okay
Pre-cardiology(1)	2024/09/24 6:08:28 pm GMT	AMA	1	I am aware that I have to take the UKMLA during my medical studies	5	2027/2028	7	7	9	7	6	7	not much	Anxious
Pre-cardiology(1)	2024/09/24 6:08:31 pm GMT	Cardiff	5	I am aware that I have to take the UKMLA during my medical studies	10	2024/2025	8	8	8	8	8	7	Need to improve management plans	Okay but need to start preparing
Pre-cardiology(1)	2024/09/24 6:08:34 pm GMT	Exeter Univeristy	5	I am aware that I have to take the UKMLA during my medical studies	6	2024/2025	7	7	3	10	7	7	Endocrinology and Neurology	Is what it is
Pre-cardiology(1)	2024/09/24 6:08:36 pm GMT	Medical university Sofia	5	I am not aware if I have to / don't have to take the UKMLA during my medical studies	0	I am not sure	0	5	5	5	5	5	Case studies and diagnostic approaches	Good
Pre-cardiology(1)	2024/09/24 6:08:38 pm GMT	Plymouth University	5	I am aware that I have to take the UKMLA during my medical studies	8	2024/2025	3	3	10	10	3	5	Basic Science	Worried
Pre-cardiology(1)	2024/09/24 6:08:39 pm GMT	cardiff	4	I am aware that I have to take the UKMLA during my medical studies	6	2025/2026	2	1	10	10	4	4	surgery	scared
Pre-cardiology(1)	2024/09/24 6:08:41 pm GMT	Leicester	5	I am aware that I have to take the UKMLA during my medical studies	5	2024/2025	7	7	2	9	4	4	mumurs	ok
Pre-cardiology(1)	2024/09/24 6:08:46 pm GMT	Cardiff University	3	I am aware that I have to take the UKMLA during my medical studies	5	2026/2027	1	1	5	4	4	3	heart sounds and murmurs	good
Pre-cardiology(1)	2024/09/24 6:08:53 pm GMT	UCL	6	I am aware that I have to take the UKMLA during my medical studies	5	2024/2025	7	4	7	6	5	6	Surgery	Unprepared
Pre-cardiology(1)	2024/09/24 6:08:54 pm GMT	Sunderland	4	I am aware that I have to take the UKMLA during my medical studies	4	2025/2026	5	4	4	4	4	4	No	Scared
Pre-cardiology(1)	2024/09/24 6:08:56 pm GMT	UoL	5	I am aware that I have to take the UKMLA during my medical studies	3	2024/2025	7	6	6	6	6	6	biochemistry	scared
Pre-cardiology(1)	2024/09/24 6:08:57 pm GMT	University of Aberdeen	4	I am aware that I have to take the UKMLA during my medical studies	8	2024/2025	5	3	3	10	3	3	Symptoms of each condition and causes of the condition itself	Feeling good to get started
Pre-cardiology(1)	2024/09/24 6:08:59 pm GMT	Cardiff University	3	I am aware that I have to take the UKMLA during my medical studies	6	2025/2026	3	2	10	10	2	3	Not really aware of the type of questions and topics that come up	lack of understanding of the UKMLA
Pre-cardiology(1)	2024/09/24 6:09:00 pm GMT	Norwich	6	I am aware that I have to take the UKMLA during my medical studies	8	2024/2025	8	7	6	8	6	5	Intercalated last year so need a refresher on all content in general	Our medical school has used MLA style questions for our end of year exams since first year so I do not feel extremely anxious
Pre-cardiology(1)	2024/09/24 6:09:05 pm GMT	manchester	4	I am aware that I have to take the UKMLA during my medical studies	1	2025/2026	2	2	9	5	2	2	i havent prepared yet	not sure
Pre-cardiology(1)	2024/09/24 6:09:07 pm GMT	university of aberdeen	4	I am aware that I have to take the UKMLA during my medical studies	6	2025/2026	4	4	10	10	6	3	knowing if the session scenarios or qs based	-
Pre-cardiology(1)	2024/09/24 6:09:13 pm GMT	University of Leeds	5	I am aware that I have to take the UKMLA during my medical studies	5	2024/2025	5	5	5	7	5	5	Management	Nervous
Pre-cardiology(1)	2024/09/24 6:09:15 pm GMT	Cardiff University	5	I am aware that I have to take the UKMLA during my medical studies	8	2024/2025	6	7	8	9	7	6	Murmurs and valvular pathology	Nervous
Pre-cardiology(1)	2024/09/24 6:09:24 pm GMT	UEA	5	I am aware that I have to take the UKMLA during my medical studies	5	2024/2025	4	4	8	8	5	1	Cardiology	Nervous
Pre-cardiology(1)	2024/09/24 6:09:49 pm GMT	Leicester	6	I am aware that I have to take the UKMLA during my medical studies	9	2024/2025	5	5	10	10	3	4	Arrythmias	Nervous
Pre-cardiology(1)	2024/09/24 6:09:50 pm GMT	University Of Nicosia	4	I am aware that I do not have to take the UKMLA during my medical studies	7	N/A	0	0	0	0	0	0	-	-
Pre-cardiology(1)	2024/09/24 6:09:53 pm GMT	Uni of southampton	5	I am aware that I have to take the UKMLA during my medical studies	0	2024/2025	0	0	10	10	0	0
Pre-cardiology(1)	2024/09/24 6:09:53 pm GMT	University of Debrecen	4	I am aware that I do not have to take the UKMLA during my medical studies	10	N/A	10	10	10	10	6	6	ECG	Feel like there can be improvement
Pre-cardiology(1)	2024/09/24 6:10:07 pm GMT	Cardiff	5	I am aware that I have to take the UKMLA during my medical studies	9	2024/2025	9	8	6	9	8	8	Renal and Urology	Happy to be part of it.
Pre-cardiology(1)	2024/09/24 6:11:02 pm GMT	University of Debrecen	4	I am aware that I do not have to take the UKMLA during my medical studies	5	2025/2026	9	5	9	8	5	5	The UKMLA syllabus entirely	Excited
Pre-cardiology(1)	2024/09/24 6:11:03 pm GMT	Norwich Medical School	5	I am aware that I have to take the UKMLA during my medical studies	10	2025/2026	6	6	5	10	6	6	Heart failure	Good
Pre-cardiology(1)	2024/09/24 6:17:13 pm GMT	Cardiff	3	I am aware that I have to take the UKMLA during my medical studies	6	2026/2027	6	6	10	10	3	3	Differentiating between diagnoses	Anxious and not confident
Pre-cardiology(1)	2024/09/24 6:20:06 pm GMT	Ulster university	4	I am aware that I have to take the UKMLA during my medical studies	7	2024/2025	7	8	6	5	7	6	Need to better understand arrhythmias	Good
Pre-cardiology(1)	2024/09/24 6:22:10 pm GMT	Cardiff	3	I am aware that I have to take the UKMLA during my medical studies	5	2026/2027	3	3	9	8	4	4	Management and question type	not prepared
Pre-cardiology(1)	2024/09/24 6:23:56 pm GMT	University of southampton	5	I am aware that I have to take the UKMLA during my medical studies	7	2024/2025	6	3	10	10	6	5	N/a
Pre-cardiology(1)	2024/09/24 7:24:36 pm GMT	KCL	5	I am aware that I have to take the UKMLA during my medical studies	8	2024/2025	6	8	9	10	7	6	Cancer - please a really confident and clear presenter for this! All blurs into one plus so many little details... + Haematology!	Not the best - a lot of content and hard to find concise and clear teaching
Pre-cardiology(1)	2024/09/24 7:27:29 pm GMT	University of Nis		I am aware that I have to take the UKMLA during my medical studies	5	N/A	5	9	8	10	6	5	Key terms for specific diseases how to distinguish between very similar diseases	Pleased to join for revision and what to bear in mind!
Pre-cardiology(1)	2024/09/24 7:27:36 pm GMT	Nottingham	5	I am aware that I have to take the UKMLA during my medical studies	8	2024/2025	6	5	9	10	7	7	OSCE skills and communication/counselling, and strokes	productive
Pre-cardiology(1)	2024/09/24 7:43:57 pm GMT	University of the Free State	5	I am not aware if I have to / don't have to take the UKMLA during my medical studies	5	N/A	3	1	10	10	2	4	All topics	Not confident
Pre-cardiology(1)	2024/09/24 7:59:27 pm GMT	Cambridge university	4	I am aware that I have to take the UKMLA during my medical studies	5	2025/2026	5	5	5	5	5	5	n/a	n/a
Pre-cardiology(1)	2024/09/24 8:21:45 pm GMT	University of Sunderland	4	I am aware that I have to take the UKMLA during my medical studies	8	2024/2025	8	7	4	8	9	7	Further reading. Knowledge is superficial	Rusty on some knowledge unless I am given MCQ options
Pre-cardiology(2)	2024/09/26 6:08:27 pm GMT	UCL	6	I am aware that I have to take the UKMLA during my medical studies	6	2024/2025	6	5	9	10	5	5	Cardiology	Unprepared
Pre-cardiology(2)	2024/09/26 6:09:11 pm GMT	Nafeesa Hina	6	I am not aware if I have to / don't have to take the UKMLA during my medical studies	5	I am not sure	5	6	6	7	7	7	Clinical subjects	Good
Pre-cardiology(2)	2024/09/26 6:10:10 pm GMT	University of Liverpool	5	I am aware that I have to take the UKMLA during my medical studies	7	2024/2025	6	5	8	10	7	5	Cardiology	I didn't get the pre-session
Pre-cardiology(2)	2024/09/26 6:10:25 pm GMT	Cardiff Univer	3	I am aware that I have to take the UKMLA during my medical studies	2	2026/2027	2	2	5	6	2	1	heart sounds and their meanings e.g. systolic murmur	good
Pre-cardiology(2)	2024/09/26 6:13:24 pm GMT	Uni of southampton	5	I am aware that I have to take the UKMLA during my medical studies	7	2024/2025	6	7	10	10	7	7	n/a	n/a
Pre-cardiology(2)	2024/09/26 6:13:55 pm GMT	St Georges University of London	4	I am aware that I have to take the UKMLA during my medical studies	6	2025/2026	2	2	8	10	5	2	translating theory into practice - when interpreting SBAs	relaxed at the mo - 18 months before my MLA exam
Pre-cardiology(2)	2024/09/26 6:14:58 pm GMT	Norwich Medical School	6	I am aware that I have to take the UKMLA during my medical studies	7	2024/2025	7	6	5	10	7	6	managements	Feel more prepared for written than osces
Pre-cardiology(2)	2024/09/26 6:15:30 pm GMT	Keele	5	I am aware that I have to take the UKMLA during my medical studies	5	2026/2027	6	7	7	7	8	8	.	.
Pre-cardiology(2)	2024/09/26 6:16:10 pm GMT	University of Debrecen	4	I am aware that I do not have to take the UKMLA during my medical studies	10	N/A	10	10	5	10	10	10	Drugs	good
Pre-cardiology(2)	2024/09/26 6:17:56 pm GMT	Cardiff	4	I am aware that I have to take the UKMLA during my medical studies	6	2025/2026	3	3	10	10	3	4	pharmacology	anxious
Pre-cardiology(2)	2024/09/26 6:20:11 pm GMT	Cardiff	4	I am aware that I have to take the UKMLA during my medical studies	6	2025/2026	4	4	4	5	5	3	all of them	meh
Pre-cardiology(2)	2024/09/26 6:22:11 pm GMT	University of Edinburgh	6	I am aware that I have to take the UKMLA during my medical studies	7	2024/2025	5	6	9	7	6	6	pharmacology - its so difficult ;((	useful to orientate me on what to expect
Pre-cardiology(2)	2024/09/26 6:23:22 pm GMT	Leicester	6	I am aware that I have to take the UKMLA during my medical studies	5	2024/2025	4	5	10	10	6	3	valve disease	good
Pre-cardiology(2)	2024/09/26 6:24:54 pm GMT	Norwich medical School	5	I am aware that I have to take the UKMLA during my medical studies	10	2025/2026	7	7	6	8	8	6	I need to work on management options for diseases	Good
Pre-cardiology(2)	2024/09/26 6:49:42 pm GMT	Cambridge	4	I am aware that I have to take the UKMLA during my medical studies	5	2024/2025	5	5	5	5	6	5	n/a	n/a
Pre-cardiology(2)	2024/09/26 6:54:42 pm GMT	sgul	1	I am aware that I have to take the UKMLA during my medical studies	5	I am not sure	3	5	8	4	5	5	forgetting investigations/tests	beneficial
Pre-cardiology(2)	2024/09/26 7:23:51 pm GMT	UFS	5	I am not aware if I have to / don't have to take the UKMLA during my medical studies	0	N/A	0	1	9	10	5	4	No gaps identified as yet	Anxious
Pre-respiratory(2)	2024/10/03 6:11:17 pm GMT	University of Liverpool	5	I am aware that I have to take the UKMLA during my medical studies	6	2024/2025	6	4	8	10	6	7	ILD	Okay
Pre-respiratory(2)	2024/10/03 6:11:27 pm GMT	University of Liverpool	5	I am aware that I have to take the UKMLA during my medical studies	7	2024/2025	8	7	7	8	8	8	Random things youve got to remember	Good
Pre-respiratory(2)	2024/10/03 6:11:30 pm GMT	University of leeds	5	I am aware that I have to take the UKMLA during my medical studies	7	2024/2025	5	5	6	8	5	5	MCQ key parts for respiratory	ready to learn
Pre-respiratory(2)	2024/10/03 6:11:36 pm GMT	SGUL	4	I am aware that I have to take the UKMLA during my medical studies	5	2026/2027	6	6	9	10	6	6	2 and 3 stage questions, eg diagnosis and then management	anxious
Pre-respiratory(2)	2024/10/03 6:11:37 pm GMT	Aberdeen	4	I am aware that I have to take the UKMLA during my medical studies	10	2025/2026	6	7	8	8	9	8	Acute med	Good
Pre-respiratory(2)	2024/10/03 6:11:43 pm GMT	University medical and dental college, Faisalabad	3	I am aware that I do not have to take the UKMLA during my medical studies	10	2028/2029	10	10	7	10	10	10	Yeh , I have some.	Amazing session full of knowledge.
Pre-respiratory(2)	2024/10/03 6:14:35 pm GMT	Leeds	5	I am aware that I have to take the UKMLA during my medical studies	6	2024/2025	6	6	8	8	5	6	Many	Nervous
Pre-respiratory(2)	2024/10/06 4:44:07 pm GMT	Glasgow medical school	4	I am aware that I have to take the UKMLA during my medical studies	4	2026/2027	9	5	5	4	4	6	Infectious disease	Scared
Pre-respiratory(2)	2024/10/06 5:17:19 pm GMT	sgul	1	I am aware that I have to take the UKMLA during my medical studies	4	2025/2026	5	5	7	7	5	5	memorising management	anxious
Pre-respiratory(2)	2024/10/06 5:18:25 pm GMT	University of Aberdeen	3	I am aware that I have to take the UKMLA during my medical studies	0	2027/2028	0	0	10	10	0	3	Need to practice and go over conditions more	Hoping to improve!!
Pre-respiratory(2)	2024/10/06 5:19:07 pm GMT	Cardiff	5	I am aware that I have to take the UKMLA during my medical studies	8	2024/2025	7	6	6	5	5	7	Niche conditions such as pulmonary hypertension	Okay
Pre-respiratory(2)	2024/10/06 5:22:11 pm GMT	UCL	6	I am aware that I have to take the UKMLA during my medical studies	10	2024/2025	10	10	10	10	10	10	Good	Good
Pre-respiratory(2)	2024/10/06 5:23:11 pm GMT	Cambridge	4	I am aware that I do not have to take the UKMLA during my medical studies	5	2024/2025	5	5	5	5	5	5	n/a	n/a
Pre-respiratory(2)	2024/10/06 5:23:36 pm GMT	Cardiff	6	I am aware that I have to take the UKMLA during my medical studies	8	2024/2025	7	7	10	10	8	7	not sure	nervous
Pre-respiratory(2)	2024/10/06 5:25:15 pm GMT	Liverpool	5	I am aware that I have to take the UKMLA during my medical studies	6	2024/2025	7	7	7	7	8	8	N/a	Good
Pre-respiratory(2)	2024/10/06 5:25:48 pm GMT	Cardiff	5	I am aware that I have to take the UKMLA during my medical studies	6	2024/2025	7	6	5	4	6	6	n/a	a little nervy
Pre-respiratory(2)	2024/10/06 5:26:12 pm GMT	UoM	5	I am aware that I have to take the UKMLA during my medical studies	6	2024/2025	7	6	6	9	7	4	.	Good
Pre-respiratory(2)	2024/10/06 5:26:12 pm GMT	UCL	6	I am aware that I have to take the UKMLA during my medical studies	7	2024/2025	8	7	6	10	7	7	just the range of knowledge necessary	?
Pre-respiratory(2)	2024/10/06 5:26:28 pm GMT	Newcastle	5	I am aware that I have to take the UKMLA during my medical studies	8	2024/2025	4	4	10	8	3	6	Obs & Gynae and Childs Health Core Conditions	Scared :( and unprepared
Pre-respiratory(2)	2024/10/06 5:28:02 pm GMT	University of Liverpool	5	I am aware that I have to take the UKMLA during my medical studies	9	2024/2025	8	8	9	8	7	8	Cor Pulmonale	Okay
Pre-respiratory(2)	2024/10/06 5:29:08 pm GMT	Cardiff University	5	I am aware that I have to take the UKMLA during my medical studies	7	2024/2025	2	3	5	2	3	2	Pharmacology	Terrified
Pre-respiratory(2)	2024/10/06 5:30:22 pm GMT	university of dundee	4	I am aware that I have to take the UKMLA during my medical studies	7	2024/2025	2	2	10	5	3	2	it is identifying 1st line and 2nd line management of diseases as well as diagnostic tests for the medical conditions	a bit anxious
Pre-respiratory(2)	2024/10/06 5:32:09 pm GMT	Ulster	4	I am aware that I have to take the UKMLA during my medical studies	8	2024/2025	7	6	10	10	7	6	Patient presentations - linking	Anxious
Pre-respiratory(2)	2024/10/06 5:33:36 pm GMT	Ulster University	4	I am aware that I have to take the UKMLA during my medical studies	5	2024/2025	3	3	7	7	5	3	Oxygen delivery	Scared
Pre-respiratory(2)	2024/10/06 5:48:53 pm GMT	Cardiff	4	I am aware that I have to take the UKMLA during my medical studies	4	2025/2026	3	3	8	6	4	3	Data interpretation questions	Nervous, unsure what the pass mark is and how this is calculated.
Pre-respiratory(2)	2024/10/06 5:52:38 pm GMT	UCL	6	I am aware that I have to take the UKMLA during my medical studies	10	2024/2025	6	6	10	6	5	5	no	good
Pre-respiratory(2)	2024/10/06 5:56:06 pm GMT	National and Kapodestrian University of Athens	6	I am not aware if I have to / don't have to take the UKMLA during my medical studies	9	I am not sure	9	9	9	10	9	9	filled some gaps	awsome
Pre-respiratory(2)	2024/10/06 6:04:33 pm GMT	University of Southampton	5	I am aware that I have to take the UKMLA during my medical studies	6	2024/2025	5	5	7	8	5	6	PE and DVT Management	Unsure
Pre-gastroenterology(1)	2024/10/08 6:10:49 pm GMT	University of leeds	5	I am aware that I have to take the UKMLA during my medical studies	5	2024/2025	6	4	7	10	5	6	specific buzz words	nervous
Pre-gastroenterology(1)	2024/10/08 6:11:13 pm GMT	SGUL	4	I am aware that I have to take the UKMLA during my medical studies	5	2026/2027	5	5	9	10	5	5	differentials hard to recall	anxious
Pre-gastroenterology(1)	2024/10/08 6:11:16 pm GMT	Cardiff	3	I am aware that I have to take the UKMLA during my medical studies	3	2026/2027	2	2	2	5	3	2	Management of conditions	N/A
Pre-gastroenterology(1)	2024/10/08 6:11:46 pm GMT	University of Liverpool	5	I am aware that I have to take the UKMLA during my medical studies	7	2024/2025	7	6	9	9	8	9	no	okay
Pre-gastroenterology(1)	2024/10/08 6:12:00 pm GMT	Cardiff University	3	I am aware that I have to take the UKMLA during my medical studies	4	2026/2027	3	3	4	5	3	3	gastro infections	good
Pre-gastroenterology(1)	2024/10/08 6:13:08 pm GMT	Edinburgh	6	I am aware that I have to take the UKMLA during my medical studies	8	2024/2025	6	6	10	7	7	6	Surgery	Nervous for the UKMLA
Pre-gastroenterology(1)	2024/10/08 6:16:37 pm GMT	barts	5	I am aware that I have to take the UKMLA during my medical studies	6	2025/2026	7	6	9	8	5	6
Pre-gastroenterology(1)	2024/10/08 6:18:50 pm GMT	University of Ulster	4	I am aware that I have to take the UKMLA during my medical studies	9	2024/2025	9	6	8	9	9	6	Pharmacology, statistics	Anxious!
Pre-gastroenterology(1)	2024/10/08 6:19:11 pm GMT	Melbourne University	2	I am aware that I do not have to take the UKMLA during my medical studies	0	N/A	0	0	0	0	0	0	Australian student, N/A.	Australian student, N/A.
Pre-gastroenterology(1)	2024/10/08 6:21:13 pm GMT	Norwich Medical School (UEA)	6	I am aware that I have to take the UKMLA during my medical studies	9	2024/2025	9	7	4	10	6	5	Managements of IBD and	Not too worried as it is similar to 4th year exams
Pre-gastroenterology(1)	2024/10/08 6:21:51 pm GMT	AMA	1	I am aware that I have to take the UKMLA during my medical studies	4	2027/2028	7	7	7	7	7	8	Question type	Excited but anxious too
Pre-gastroenterology(1)	2024/10/08 6:25:09 pm GMT	University of Aberdeen	3	I am aware that I have to take the UKMLA during my medical studies	7	2026/2027	2	3	5	7	5	3	IBS treatment	revision sessions are really helpful always
Pre-gastroenterology(1)	2024/10/08 6:34:18 pm GMT	King's College London	4	I am aware that I have to take the UKMLA during my medical studies	0	2025/2026	0	0	10	7	0	0	Important really struggling with remembering the content as I've intercalated	Nervous
Pre-gastroenterology(1)	2024/10/08 6:42:19 pm GMT	Uni of Glasgow	4	I am aware that I have to take the UKMLA during my medical studies	5	2026/2027	6	4	6	7	8	5	Not sure	Okay
Pre-gastroenterology(1)	2024/10/08 7:20:36 pm GMT	University of Buckingham	2	I am aware that I have to take the UKMLA during my medical studies	5	2026/2027	4	4	7	7	5	5	Content covered	unprepared
Pre-gastroenterology(1)	2024/10/08 7:29:44 pm GMT	University		I am not aware if I have to / don't have to take the UKMLA during my medical studies	5	N/A	5	5	5	5	5	5	Discussions	Helpful
Pre-gastroenterology(1)	2024/10/08 7:31:05 pm GMT	Barts and The London	6	I am aware that I have to take the UKMLA during my medical studies	8	2024/2025	8	7	7	10	8	7	-	-
Pre-gastroenterology(2)	2024/10/10 5:59:26 pm GMT	Aberdeen	4	I am aware that I have to take the UKMLA during my medical studies	10	2024/2025	10	10	10	10	10	10	None	Good
Pre-gastroenterology(2)	2024/10/10 6:01:48 pm GMT	Edinburgh	6	I am aware that I have to take the UKMLA during my medical studies	8	2024/2025	6	7	10	6	6	6	N/A	Nervous
Pre-gastroenterology(2)	2024/10/10 6:01:50 pm GMT	Edinburgh	5	I am aware that I have to take the UKMLA during my medical studies	5	2025/2026	4	3	10	8	3	3	unsure	Motivated to study
Pre-gastroenterology(2)	2024/10/10 6:01:51 pm GMT	Cardiff University	3	I am aware that I have to take the UKMLA during my medical studies	3	2026/2027	3	3	4	5	3	4	N/A	alright
Pre-gastroenterology(2)	2024/10/10 6:02:50 pm GMT	UoSouthsmpton	5	I am aware that I have to take the UKMLA during my medical studies	8	2024/2025	7	7	7	10	7	6	Difference Uc v Crohns	Goodish
Pre-gastroenterology(2)	2024/10/10 6:05:32 pm GMT	cardiff	3	I am aware that I have to take the UKMLA during my medical studies	6	2025/2026	1	1	9	6	2	1	-	-
Pre-gastroenterology(2)	2024/10/10 6:08:21 pm GMT	Uni of Glasgow	4	I am aware that I have to take the UKMLA during my medical studies	7	2025/2026	7	4	7	8	4	4	acute abdo management	stressed
Pre-gastroenterology(2)	2024/10/10 6:08:55 pm GMT	SGUL	4	I am aware that I have to take the UKMLA during my medical studies	5	2026/2027	5	5	10	10	5	5	DDX's	anxious
Pre-gastroenterology(2)	2024/10/10 6:11:08 pm GMT	university of medical school	2	I am aware that I have to take the UKMLA during my medical studies	4	I am not sure	4	2	6	6	5	4	the managmnt of each condition	worried
Pre-gastroenterology(2)	2024/10/10 7:15:56 pm GMT	University of Liverpool	5	I am aware that I have to take the UKMLA during my medical studies	8	2024/2025	7	8	9	10	7	6	Oesophageal pathologies	Better
Pre-gastroenterology(2)	2024/10/10 7:16:31 pm GMT	University of Sunderland	4	I am aware that I have to take the UKMLA during my medical studies	9	2024/2025	7	7	7	8	8	8	Investigations - need to focus more on what is first line?	Nervous
Pre-gastroenterology(2)	2024/10/10 7:20:18 pm GMT	NKUA	6	I am aware that I do not have to take the UKMLA during my medical studies	7	I am not sure	7	7	5	9	7	8	mallory weiss vs boerhaave was tricky but i figured it out	perfect
Pre-gastroenterology(2)	2024/10/10 7:40:24 pm GMT	Cardiff University	5	I am aware that I have to take the UKMLA during my medical studies	3	2024/2025	6	6	8	5	8	7	Pharmacy	Scared
Pre-hepatology	2024/10/15 5:57:52 pm GMT	University of Southampton	6	I am aware that I have to take the UKMLA during my medical studies	10	2024/2025	2	2	10	10	2	1	Knowing investigations, ddx and pathophysiology of presentations and conditions on mla	Good
Pre-hepatology	2024/10/15 5:59:24 pm GMT	Leicester Medical School	5	I am aware that I have to take the UKMLA during my medical studies	8	2024/2025	7	6	8	8	7	5	/	/
Pre-hepatology	2024/10/15 6:01:03 pm GMT	Aberdeen	4	I am aware that I have to take the UKMLA during my medical studies	8	2025/2026	7	6	9	8	7	8	' None	Good
Pre-hepatology	2024/10/15 6:01:21 pm GMT	SGUL	4	I am aware that I have to take the UKMLA during my medical studies	5	2026/2027	5	5	10	10	5	5	ethics, sociology, epidemiology,	anxious
Pre-hepatology	2024/10/15 6:03:45 pm GMT	University of Glasgow	6	I am aware that I have to take the UKMLA during my medical studies	8	2024/2025	6	6	8	10	5	5	hepatitis	Fine
Pre-hepatology	2024/10/15 6:03:58 pm GMT	UoSouthampton	5	I am aware that I have to take the UKMLA during my medical studies	6	2024/2025	6	5	8	10	7	4	Hepatitis	Semi
Pre-hepatology	2024/10/15 6:04:16 pm GMT	Nottingham	4	I am aware that I have to take the UKMLA during my medical studies	5	2025/2026	5	5	8	8	7	5	unsure	unsure
Pre-hepatology	2024/10/15 6:04:36 pm GMT	Manchester	5	I am aware that I have to take the UKMLA during my medical studies	5	2024/2025	5	4	9	7	6	6	Second line management; Understanding the actual sign behind the pathophysiology of disease - my university didn't teach this well during years 1-2 due to COVID, and then in the clinical years there is no focus on the science	Lost
Pre-hepatology	2024/10/15 6:05:48 pm GMT	University of Manchester	5	I am aware that I have to take the UKMLA during my medical studies	6	2024/2025	6	6	10	10	7	7	renal	scared
Pre-hepatology	2024/10/15 6:05:51 pm GMT	Edinburgh	5	I am aware that I have to take the UKMLA during my medical studies	5	2025/2026	5	3	7	7	3	2	na	unsure
Pre-hepatology	2024/10/15 6:05:53 pm GMT	Cambridge Uni	6	I am aware that I have to take the UKMLA during my medical studies	8	2024/2025	7	7	6	7	6	4	Hepatitis	N/A
Pre-hepatology	2024/10/15 6:06:07 pm GMT	University of Birmingham	5	I am aware that I have to take the UKMLA during my medical studies	7	2024/2025	7	6	5	8	6	4	Liver failure	Fine
Pre-hepatology	2024/10/15 6:09:48 pm GMT	Uni of glasgow	4	I am aware that I have to take the UKMLA during my medical studies	7	2025/2026	7	6	7	7	8	7	Renal	Okayish
Pre-hepatology	2024/10/15 6:10:30 pm GMT	University of Leeds	6	I am aware that I have to take the UKMLA during my medical studies	5	2024/2025	0	2	10	8	2	1	I think I'm missing a lot of basics from the COVID years so I get some simple things confused which leads onto bigger problems	Absolutely terrified
Pre-hepatology	2024/10/15 6:35:16 pm GMT	Cardiff University	3	I am aware that I have to take the UKMLA during my medical studies	3	2026/2027	3	3	4	5	3	2	everything	not great
Pre-hepatology	2024/10/15 7:16:41 pm GMT	Cardiff University	5	I am aware that I have to take the UKMLA during my medical studies	6	2024/2025	6	6	6	6	6	1	Pharmacy	Not sure anymore
Pre-hepatology	2024/10/15 7:36:51 pm GMT	AMA	1	I am aware that I have to take the UKMLA during my medical studies	7	2027/2028	7	7	7	7	7	7	Time scale	Anxious
Pre-neurology(1)	2024/10/22 6:09:47 pm GMT	cardiff	3	I am aware that I have to take the UKMLA during my medical studies	5	2026/2027	3	4	9	6	7	7	psych	scared
Pre-neurology(1)	2024/10/22 6:10:10 pm GMT	University of Nis		I am aware that I do not have to take the UKMLA during my medical studies	5	N/A	5	6	5	10	5	4	key terms for diseases remembering them all	great, will be very useful
Pre-neurology(1)	2024/10/22 6:10:45 pm GMT	|St georges U of L	4	I am aware that I have to take the UKMLA during my medical studies	5	2025/2026	5	5	10	10	5	4	realistic DDxs	Anxious
Pre-neurology(1)	2024/10/22 6:12:34 pm GMT	UEA	3	I am aware that I have to take the UKMLA during my medical studies	7	2026/2027	5	6	7	7	7	7	unsure	agesss away mate
Pre-neurology(1)	2024/10/22 6:12:50 pm GMT	University of Surrey		I am aware that I do not have to take the UKMLA during my medical studies	5	N/A	5	5	7	7	3	3	Stroke and differentiating them	Excited
Pre-neurology(1)	2024/10/22 6:13:51 pm GMT	university of leeds	5	I am aware that I have to take the UKMLA during my medical studies	7	2024/2025	2	2	10	10	3	1	various odd things that I must not have gone over well in year 2 and 3	anxious and unprepared
Pre-neurology(1)	2024/10/22 6:16:11 pm GMT	hull York medical school	5	I am aware that I have to take the UKMLA during my medical studies	8	2025/2026	6	6	7	10	6	3	strokes - differentiating the types	n.a
Pre-neurology(1)	2024/10/22 6:49:05 pm GMT	UoSouthampton	5	I am aware that I have to take the UKMLA during my medical studies	7	2024/2025	6	6	10	10	7	5	Strokes by anatomy	Semi confident
Pre-neurology(1)	2024/10/22 7:05:23 pm GMT	University of Manchester	5	I am aware that I have to take the UKMLA during my medical studies	7	2024/2025	6	6	10	8	7	5	identifying lesions and strokes	eager
Pre-neurology(1)	2024/10/22 7:06:24 pm GMT	NKUA	6	I am aware that I do not have to take the UKMLA during my medical studies	9	N/A	7	8	7	9	8	8	EVERYTHING CLEAR	I DON'T HAVE TO TAKE IT BUT THESE PRESENTATIONS SURELY HELP THOSE WHO WILL TAKE THE EXAMS
Pre-neurology(1)	2024/10/23 10:08:34 am GMT	Manchester medical school	6	I am aware that I have to take the UKMLA during my medical studies	8	2024/2025	6	2	9	4	4	4	Neuro anatomy and application to clinical knowledge	Alright
Pre-paediatrics(2)	2024/11/03 5:06:45 pm CET	hull York medical school	5	I am aware that I have to take the UKMLA during my medical studies	10	2025/2026	8	8	8	10	8	8	n.a	n.a
Pre-paediatrics(2)	2024/11/03 5:17:58 pm CET	Uni of glasgow	4	I am aware that I have to take the UKMLA during my medical studies	7	2025/2026	6	6	10	9	6	8	Cardiology & obstetrics	Stressy
Pre-paediatrics(2)	2024/11/03 5:35:49 pm CET	UoS	5	I am aware that I have to take the UKMLA during my medical studies	6	2024/2025	6	6	10	6	6	7	-	-
Pre-paediatrics(2)	2024/11/03 6:04:39 pm CET	UCL		I am aware that I have to take the UKMLA during my medical studies	6	N/A	5	5	7	4	6	5	too many to list	nervous
Pre-paediatrics(2)	2024/11/03 6:15:40 pm CET	Cardiff Uni	3	I am aware that I have to take the UKMLA during my medical studies	4	2026/2027	1	1	3	8	1	2	Understanding initial managements	very underprepared

## Sheet: Overall Post
	Timestamp	Name of Medical School	Year of Medical School	Are you aware if you have to take the UKMLA during your medical studies?	What would you rate your understanding of the UKMLA assessment post-session?	What year of medical school will you sit the UKMLA exam?	How would you rate your confidence of passing the UKMLA post-session?	How would you rate your preparedness for passing the UKMLA post-session?	How would you rate your anxiety for passing the UKMLA post-session?	How would you rate your motivation for attending UKMLA focused events post-session?	How would you rate your overall knowledge for the UKMLA post-session?	How would you rate your topic specific knowledge for the UKMLA post-session?	What are some significant gaps you have identified in your knowledge in preparing for the UKMLA post-session?	How do you feel taking the UKMLA post-session?
Post-oncology	2025/01/09 8:17:14 pm GMT	Shu		I am aware that I have to take the UKMLA during my medical studies	7	2024/2025	7	6	8	7	7	6	5 months	Anxious
Post-oncology	2025/01/09 8:17:21 pm GMT	glasgow	6	I am aware that I have to take the UKMLA during my medical studies	8	2024/2025	9	9	7	10	7	7	treatments for oncological emergencies	good
Post-oncology	2025/01/09 8:18:08 pm GMT	Cardiff univeristy	4	I am aware that I have to take the UKMLA during my medical studies	5	2025/2026	6	8	10	8	8	9	pharmacology	better
Post-oncology	2025/01/09 8:24:45 pm GMT	Cardiff University	3	I am aware that I have to take the UKMLA during my medical studies	3	2026/2027	5	4	4	10	2	3	Microbiology, dermatology	Would like more revision sessions
Post-oncology	2025/01/09 8:41:59 pm GMT	Nottingham	4	I am aware that I have to take the UKMLA during my medical studies	10	2025/2026	7	7	7	9	9	9	Unsure	Unsure but the session was helpful for building confidence around the subject
Post-dermatology	2024/12/10 8:37:09 pm GMT	leicester university	5	I am aware that I have to take the UKMLA during my medical studies	5	2024/2025	7	7	7	7	6	7	cardio	worried
Post-rheumatology(1)	2024/12/03 8:22:18 pm GMT	Cardiff	3	I am aware that I have to take the UKMLA during my medical studies	4	2026/2027	3	2	4	10	2	5	I am not familiar with types of vasculitis and this session has prompted me to do further reading.	I do not feel very confident but I am motivated to keep learning.
Post-rheumatology(1)	2024/12/03 8:28:38 pm GMT	UoSouthampton	5	I am aware that I have to take the UKMLA during my medical studies	6	2024/2025	6	6	9	10	6	6	N	Okayish
Post-rheumatology(1)	2024/12/03 9:52:25 pm GMT	Cardiff	3	I am aware that I have to take the UKMLA during my medical studies	10	2026/2027	10	10	10	10	10	10	give me the slides the feedback form wont load properly	give me the slides the feedback form wont load properly
Post-opthalmology	2024/11/28 9:47:00 pm CET	Glasgow	6	I am aware that I have to take the UKMLA during my medical studies	9	2024/2025	6	7	7	7	8	7	Glaucoma	Good
Post-opthalmology	2024/11/28 9:47:18 pm CET	UoSouthampton	5	I am aware that I have to take the UKMLA during my medical studies	7	2024/2025	6	6	9	10	6	5	-	bit better
Post-opthalmology	2024/11/28 9:48:49 pm CET	Manchester		I am not aware if I have to / don't have to take the UKMLA during my medical studies	6	N/A	8	6	6	5	9	6	AMD	Na
Post-opthalmology	2024/11/28 10:21:46 pm CET	Barts and the london	5	I am aware that I have to take the UKMLA during my medical studies	7	2024/2025	7	7	5	10	7	7	eye movements and eye tract lesions	okay
Post-diabetes	2024/11/26 8:32:55 pm GMT	UMT	6	I am not aware if I have to / don't have to take the UKMLA during my medical studies	8	I am not sure	8	9	3	8	8	9	-	-
Post-diabetes	2024/11/26 8:33:47 pm GMT	Isctem	5	I am not aware if I have to / don't have to take the UKMLA during my medical studies	3	2026/2027	3	3	9	10	9	7	Read eat repeat	Its helpful
Post-diabetes	2024/11/26 8:35:50 pm GMT	university of wolverhampton		I am not aware if I have to / don't have to take the UKMLA during my medical studies	4	I am not sure	7	5	9	8	8	9	6months	nervous
Post-diabetes	2024/11/26 8:49:15 pm GMT	Cambridge	6	I am aware that I have to take the UKMLA during my medical studies	9	2024/2025	7	8	8	8	8	9	Diabetes post-insipidus	Much more confident with Diabetic drugs!
Post-endocrine	2024/11/21 8:25:09 pm GMT	UEA	4	I am aware that I have to take the UKMLA during my medical studies	5	2025/2026	8	8	3	8	8	8	Hyperparathyroidism	More reassured
Post-endocrine	2024/11/21 8:55:14 pm GMT	University of glasgow	6	I am aware that I have to take the UKMLA during my medical studies	8	2024/2025	6	7	10	10	6	8	management of conditions	nervous but better at SBAs
Post-endocrine	2024/11/21 8:55:46 pm GMT	Glasgow	4	I am aware that I have to take the UKMLA during my medical studies	8	2025/2026	6	8	5	10	8	10	Just remembering everything, different Ix and gold standard Ix, and different treatment options for diff causes of conditions	Better about endo Qs
Post-endocrine	2024/11/21 8:56:50 pm GMT	Bangor University	2	I am aware that I have to take the UKMLA during my medical studies	6	2027/2028	2	4	6	10	5	7	Endocrinology	3 more years of work should prepare me adequately
Post-metabolic	2024/11/19 8:47:07 pm GMT	Liverpool	5	I am aware that I have to take the UKMLA during my medical studies	10	2024/2025	10	10	10	10	10	10	N/a	Good
Post-metabolic	2024/11/19 8:49:28 pm GMT	C21 North Wales	4	I am aware that I have to take the UKMLA during my medical studies	10	2025/2026	5	5	5	10	4	8	GI, Nephrology, Haematology, Infective diseases	Happy
Post-metabolic	2024/11/19 8:50:18 pm GMT	Cardiff	5	I am aware that I have to take the UKMLA during my medical studies	6	2024/2025	7	10	6	7	8	6	Management of metabolic conditions	Alright ish
Post-metabolic	2024/11/19 8:54:47 pm GMT	Barts and the London	5	I am aware that I have to take the UKMLA during my medical studies	8	2024/2025	6	5	8	8	6	8	electrolyte imbalances	not too bad
Post-renal	2024/11/14 8:37:27 pm GMT	UoSouthampton	5	I am aware that I have to take the UKMLA during my medical studies	6	2024/2025	6	6	9	10	6	6	-	-
Post-renal	2024/11/14 8:37:51 pm GMT	Cardiff	4	I am aware that I have to take the UKMLA during my medical studies	6	2025/2026	7	7	6	8	7	8
Post-renal	2024/11/14 8:40:26 pm GMT	University of Manchester	5	I am aware that I have to take the UKMLA during my medical studies	8	2024/2025	5	5	7	10	7	7	Nephritic syndromes	Na
Post-renal	2024/11/14 8:43:10 pm GMT	Buckingham	5	I am aware that I have to take the UKMLA during my medical studies	8	2024/2025	8	8	8	8	8	8	Initial management	Dont want to
Post-genitourinary	2024/11/12 8:33:03 pm GMT	Liverpool	5	I am aware that I have to take the UKMLA during my medical studies	10	2024/2025	10	9	9	10	10	10	Exam favourite topic's- this session was very useful for this	Great teaching, extremely useful, great teacher and detail (some sessions are less detailed/ challenging and not as good- but this teacher is really excellent). Thanks
Post-genitourinary	2024/11/12 8:33:21 pm GMT	University of Birmingham	5	I am aware that I have to take the UKMLA during my medical studies	7	2024/2025	8	8	4	10	8	8	gonorrhoea vs chlamydia	More prepared
Post-genitourinary	2024/11/12 8:33:43 pm GMT	Glasgow University	5	I am aware that I have to take the UKMLA during my medical studies	4	2024/2025	6	7	4	7	6	7	probably more knowledge gap on the the management steps in oder	feel more confident
Post-genitourinary	2024/11/12 8:35:45 pm GMT	Barts	5	I am aware that I have to take the UKMLA during my medical studies	7	2024/2025	8	8	4	10	9	9	Knowledge of stis	Okay
Post-genitourinary	2024/11/12 8:37:16 pm GMT	UoSouthampton	5	I am aware that I have to take the UKMLA during my medical studies	8	2024/2025	6	7	9	10	7	6	Trichomonas	Little less anxious
Post-genitourinary	2024/11/12 8:38:05 pm GMT	Barts and the London	5	I am aware that I have to take the UKMLA during my medical studies	6	2024/2025	6	6	6	6	6	6	n/a	n/a
Post-genitourinary	2024/11/12 8:39:34 pm GMT	Cardiff C21N	3	I am aware that I have to take the UKMLA during my medical studies	10	2027/2028	10	10	10	10	10	10	None	Good
Post-obstetrics	2024/11/05 8:52:20 pm GMT	Ulster University	4	I am aware that I have to take the UKMLA during my medical studies	9	2024/2025	9	9	2	9	8	9	N/a	N/a
Post-obstetrics	2024/11/05 8:53:09 pm GMT	Cambridge	6	I am aware that I have to take the UKMLA during my medical studies	8	2024/2025	8	6	5	7	9	9	M/A	N/A
Post-obstetrics	2024/11/05 8:54:03 pm GMT	Barts and the London	5	I am aware that I have to take the UKMLA during my medical studies	10	2024/2025	8	8	4	10	7	8	medical obstetrics, management of obstetric emergencies	okay
Post-obstetrics	2024/11/05 8:55:54 pm GMT	Ifugao State University	2	I am aware that I have to take the UKMLA during my medical studies	7	2024/2025	7	6	5	9	7	7	a bit understanding about the lesson	Nervous
Post-obstetrics	2024/11/05 8:58:19 pm GMT	cambridge	5	I am aware that I have to take the UKMLA during my medical studies	5	2026/2027	3	4	6	5	5	5	-	nervous
Post-obstetrics	2024/11/07 5:48:17 pm GMT	Cardiff	5	I am aware that I have to take the UKMLA during my medical studies	5	2024/2025	7	8	5	9	8	7	Haematology, Infectious Diseases, Anaesthesia	I will do my best as usual but unsure of confidence of passing
Post-paediatrics(2)	2024/11/03 5:49:14 pm GMT	Ucl		I am aware that I have to take the UKMLA during my medical studies	8	N/A	7	7	4	7	5	5	revis content	better
Post-paediatrics(2)	2024/11/03 5:49:44 pm GMT	Glasgow university	5	I am aware that I have to take the UKMLA during my medical studies	10	2024/2025	10	10	5	10	10	10	the presentations and conditions can be hard to match sometimes - can feel overwhelming	A bit more confident about general paeds topics
Post-paediatrics(2)	2024/11/03 5:50:09 pm GMT	University of Edinburgh	6	I am aware that I have to take the UKMLA during my medical studies	6	2024/2025	9	6	9	9	9	5	..	...
Post-paediatrics(2)	2024/11/03 5:51:05 pm GMT	University of Manchester	5	I am aware that I have to take the UKMLA during my medical studies	4	2024/2025	4	4	10	9	5	4	Physiology/Science behind a lot of paediatric conditions	Still worried but it was a very good session
Post-paediatrics(2)	2024/11/03 6:30:03 pm GMT	Ulster University	4	I am aware that I have to take the UKMLA during my medical studies	9	2024/2025	7	9	3	10	6	8	N/a	More confident in paediatric content
Post-paediatrics(2)	2024/11/03 6:42:23 pm GMT	Barts	5	I am aware that I have to take the UKMLA during my medical studies	9	2024/2025	9	9	3	10	8	8	Peadiatric milestones/ redflags	Okay
Post-paediatrics(2)	2024/11/03 10:10:06 pm GMT	Aston Medical School	3	I am aware that I have to take the UKMLA during my medical studies	4	2026/2027	4	4	6	8	4	8	-	Still have a lot to cover
Post-neurology(1)	2024/10/22 6:56:08 pm GMT	SGUL	4	I am aware that I have to take the UKMLA during my medical studies	7	2025/2026	5	5	10	10	7	8	Developing realistic DDxs rapidly	Anxious
Post-neurology(1)	2024/10/22 6:57:06 pm GMT	University of Nis		I am aware that I do not have to take the UKMLA during my medical studies	8	N/A	8	8	3	10	8	5	A great session what to look out for on neurology condiitons	good, equipped
Post-neurology(1)	2024/10/22 6:57:30 pm GMT	University of Aberdeen	3	I am aware that I have to take the UKMLA during my medical studies	5	2026/2027	6	5	7	9	5	3	Types of stroke	Not ready quite yet but i feel more confident about the topics covered today
Post-neurology(1)	2024/10/22 6:57:50 pm GMT	University of Manchester	5	I am aware that I have to take the UKMLA during my medical studies	8	2024/2025	8	8	8	10	8	7	Identifying strokes	Really good, speaker was very good and inputted all the key and relevant information.
Post-neurology(1)	2024/10/22 6:57:50 pm GMT	Ulster University	4	I am aware that I have to take the UKMLA during my medical studies	6	2024/2025	6	7	8	5	6	7	The parkinson plus syndromes and bamford classificalt	nervous as hell but will go back these notes for help for sure
Post-neurology(1)	2024/10/22 6:59:04 pm GMT	University of Leicester	5	I am aware that I have to take the UKMLA during my medical studies	7	2024/2025	7	7	7	7	7	8	/	more prepared
Post-neurology(1)	2024/10/22 7:03:52 pm GMT	cardiff	5	I am aware that I have to take the UKMLA during my medical studies	8	2024/2025	7	7	9	10	8	8	n/a	anxious still
Post-neurology(1)	2024/10/22 7:04:53 pm GMT	UCL	6	I am aware that I have to take the UKMLA during my medical studies	8	2024/2025	8	5	7	10	8	8	medication and pharmacy aspect	more confident especially revising common topics in neurology
Post-neurology(1)	2024/10/22 7:10:20 pm GMT	NKUA	6	I am aware that I do not have to take the UKMLA during my medical studies	8	N/A	9	9	9	9	9	9	EVERYTHING WAS CLEAR	I ADORE THESE SESSIONS. KEEP UPP THE GREAT WORK
Post-neurology(1)	2024/10/22 7:16:27 pm GMT	Glasgow	4	I am aware that I have to take the UKMLA during my medical studies	8	2025/2026	6	6	10	10	8	7	I forgot all of the dementia types	N/A
Post-neurology(1)	2024/10/22 7:16:42 pm GMT	hull york medical school	5	I am aware that I have to take the UKMLA during my medical studies	10	2025/2026	10	10	10	10	10	10	n.a	n.a
Post-neurology(1)	2024/10/22 7:17:56 pm GMT	UEA	3	I am aware that I have to take the UKMLA during my medical studies	8	2026/2027	8	7	7	8	7	8	dont know	still ages away mate
Post-neurology(1)	2024/10/22 7:18:27 pm GMT	Edinburgh	6	I am aware that I have to take the UKMLA during my medical studies	8	2024/2025	8	8	10	7	7	7	Spinal cord lesions	This was an excellent sessions and great for finals revision
Post-neurology(1)	2024/10/22 7:27:15 pm GMT	Barts and the london	5	I am aware that I have to take the UKMLA during my medical studies	8	2024/2025	8	8	4	10	8	9	Management plans	Okay
Post-neurology(1)	2024/10/22 8:07:33 pm GMT	Leeds	5	I am aware that I have to take the UKMLA during my medical studies	6	2024/2025	6	4	6	10	5	6	I think knowledge is generally a bit low on topics from third and second year	anxious and terrified
Post-neurology(1)	2024/10/22 8:34:51 pm GMT	Bristol	5	I am aware that I have to take the UKMLA during my medical studies	9	2024/2025	8	7	3	9	7	8	Stroke	Good
Post-neurology(1)	2024/10/23 10:09:52 am GMT	Manchester medical school	6	I am aware that I have to take the UKMLA during my medical studies	7	2024/2025	4	5	8	4	4	4	Clinical knowledge linked to anatomical knowledge	Not great
Post-respiratory(1)	2024/10/20 5:18:15 pm GMT	SGUL	4	I am aware that I have to take the UKMLA during my medical studies	9	2026/2027	7	6	10	10	7	7	DDxs	Anxious
Post-respiratory(1)	2024/10/20 5:27:57 pm GMT	Cardiff University	5	I am aware that I have to take the UKMLA during my medical studies	6	2024/2025	6	6	6	6	6	6	Physiology	OK
Post-respiratory(1)	2024/10/20 5:35:47 pm GMT	barts	5	I am aware that I have to take the UKMLA during my medical studies	8	2024/2025	8	7	6	10	6	8	need to know management plans/guidelines	ok
Post-respiratory(1)	2024/10/20 5:37:21 pm GMT	University of Manchester	5	I am aware that I have to take the UKMLA during my medical studies	6	2024/2025	5	4	9	10	4	5	Respiratory cancers and paraneoplastic syndromes, as well as conditions that I havenâ€™t encountered regularly on wards, such as pulmonary fibrosis and sarcoidosis.	Much better regarding the content I know, where to focus revision, and strategies that I can use to answer questions (eg: using details in the question stem to rule out potential answers and choose the most likely options among those remaining).
Post-psychiatry	2024/10/17 7:55:19 pm GMT	Leeds	5	I am aware that I have to take the UKMLA during my medical studies	8	2024/2025	8	8	8	8	8	8	Psych drugs	much better
Post-psychiatry	2024/10/17 7:55:50 pm GMT	UOM	2	I am aware that I have to take the UKMLA during my medical studies	6	2024/2025	8	8	8	8	8	7	NO	GOOF
Post-psychiatry	2024/10/17 7:55:54 pm GMT	Uni of Nottingham	4	I am aware that I have to take the UKMLA during my medical studies	9	2025/2026	9	9	2	9	9	10	Unsure	Feeling more positive about psychiatry
Post-psychiatry	2024/10/17 7:57:46 pm GMT	UoSouthampton	5	I am aware that I have to take the UKMLA during my medical studies	8	2024/2025	9	7	8	10	7	9	.	better
Post-psychiatry	2024/10/17 7:57:47 pm GMT	University Medical & Dental College Faisalabad, Pakistan		I am not aware if I have to / don't have to take the UKMLA during my medical studies	8	2025/2026	7	3	7	8	7	9	So many to talk about	Motivated
Post-psychiatry	2024/10/17 7:57:54 pm GMT	Keele	4	I am aware that I have to take the UKMLA during my medical studies	8	2024/2025	7	7	4	10	7	6	SAme as before I wrote on the pre form	Definitely better! great delivery of a lot of content in a short space of time!!
Post-psychiatry	2024/10/17 7:58:01 pm GMT	UTG SMAHS		I am not aware if I have to / don't have to take the UKMLA during my medical studies	7	N/A	7	7	7	7	7	7	I am more familiar with the topic now	Pretty confident
Post-psychiatry	2024/10/17 7:59:37 pm GMT	university of leeds	4	I am aware that I have to take the UKMLA during my medical studies	3	2025/2026	4	4	9	10	5	6	4th year so missing gaps of content	STRESSED
Post-psychiatry	2024/10/17 8:01:00 pm GMT	Leicester Medical school	5	I am aware that I have to take the UKMLA during my medical studies	8	2024/2025	6	4	4	7	2	4	management details	motivated
Post-psychiatry	2024/10/17 8:05:06 pm GMT	leeds	5	I am aware that I have to take the UKMLA during my medical studies	9	2024/2025	9	9	9	9	9	9	N/A	N/A
Post-psychiatry	2024/10/17 8:13:49 pm GMT	Leicester	5	I am aware that I have to take the UKMLA during my medical studies	7	2024/2025	6	6	7	8	7	7	trying to remember the specific time frames for the conditions and their diagnosis	A bit more confident
Post-psychiatry	2024/10/17 8:13:54 pm GMT	University of Leeds	5	I am aware that I have to take the UKMLA during my medical studies	8	2024/2025	6	6	8	9	8	7	diagnostic criteria	Apprehensive but more confident
Post-psychiatry	2024/10/17 8:17:24 pm GMT	Barts and the London	5	I am aware that I have to take the UKMLA during my medical studies	10	2024/2025	9	8	4	10	7	9	the psych session was amazing and comprehensive, can't think of any gaps psychiatry-wise	good
Post-psychiatry	2024/10/17 8:30:40 pm GMT	Cardiff University	5	I am aware that I have to take the UKMLA during my medical studies	5	2024/2025	7	7	7	7	7	6	Pharmacy	Alright
Post-psychiatry	2024/10/17 8:34:15 pm GMT	UEA	4	I am aware that I have to take the UKMLA during my medical studies	8	2025/2026	8	8	3	8	8	8	differential diagnosis	improved confidence
Post-psychiatry	2024/10/17 8:43:57 pm GMT	leicester	6	I am aware that I have to take the UKMLA during my medical studies	9	2024/2025	8	8	8	9	8	8	/	/
Post-psychiatry	2024/10/25 6:57:38 pm GMT	Swansea	2	I am aware that I have to take the UKMLA during my medical studies	2	2026/2027	4	2	2	5	4	3	Medication	Apprehension
Post-cardiology(1)	2024/09/24 8:10:46 pm GMT	cardiff	3	I am aware that I have to take the UKMLA during my medical studies	6	2026/2027	6	5	8	8	6	6	I need to recap valves and arrhythmias	not yet
Post-cardiology(1)	2024/09/24 8:10:59 pm GMT	cardiff	5	I am aware that I have to take the UKMLA during my medical studies	8	2024/2025	8	8	8	8	8	7	valvular disease	more confident
Post-cardiology(1)	2024/09/24 8:11:05 pm GMT	Plymouth University	5	I am aware that I have to take the UKMLA during my medical studies	10	2024/2025	4	5	9	10	5	8	GI	Worried
Post-cardiology(1)	2024/09/24 8:11:13 pm GMT	Plovdiv Medical University		I am aware that I have to take the UKMLA during my medical studies	8	2026/2027	5	6	9	7	7	8	Valvular diseases	Anxious
Post-cardiology(1)	2024/09/24 8:11:21 pm GMT	Otago Medical School	5	I am aware that I do not have to take the UKMLA during my medical studies	6	N/A	5	5	6	6	6	6	Arrhythmia	Great
Post-cardiology(1)	2024/09/24 8:11:24 pm GMT	University Of Nicosia	4	I am aware that I do not have to take the UKMLA during my medical studies	8	N/A	5	5	5	4	5	5	-	-
Post-cardiology(1)	2024/09/24 8:11:26 pm GMT	Cardiff	5	I am aware that I have to take the UKMLA during my medical studies	6	2024/2025	7	5	8	6	6	6	Atrial Flutter	Ok
Post-cardiology(1)	2024/09/24 8:11:34 pm GMT	University of Nis		I am aware that I have to take the UKMLA during my medical studies	8	N/A	8	8	8	8	8	8	Key terms of key diseases	A great session on Cardiology
Post-cardiology(1)	2024/09/24 8:11:51 pm GMT	Cardiff	5	I am aware that I have to take the UKMLA during my medical studies	9	2024/2025	9	9	4	9	9	9	Valvular heart disease.	Thank you.
Post-cardiology(1)	2024/09/24 8:11:52 pm GMT	University of Debrecen	4	I am aware that I do not have to take the UKMLA during my medical studies	7	2025/2026	9	7	10	10	5	7	Cardiac murmurs and treatment	Still anxious
Post-cardiology(1)	2024/09/24 8:12:02 pm GMT	UCL	6	I am aware that I have to take the UKMLA during my medical studies	10	2024/2025	8	8	7	8	8	8	AVNRT, AVRT	good
Post-cardiology(1)	2024/09/24 8:12:06 pm GMT	abdn	4	I am aware that I have to take the UKMLA during my medical studies	10	2026/2027	5	10	10	10	10	10	m	m
Post-cardiology(1)	2024/09/24 8:12:10 pm GMT	Uni of southampton	5	I am aware that I have to take the UKMLA during my medical studies	8	2024/2025	7	7	6	10	8	8
Post-cardiology(1)	2024/09/24 8:12:12 pm GMT	Norwich	6	I am aware that I have to take the UKMLA during my medical studies	8	2024/2025	8	7	5	10	7	8	Management of valvular disease	More confident
Post-cardiology(1)	2024/09/24 8:12:23 pm GMT	Norwich Medical School	5	I am aware that I have to take the UKMLA during my medical studies	7	2025/2026	6	6	9	10	5	6	Valvular disease and arrythmias are subjects I need to focus on	Anxious
Post-cardiology(1)	2024/09/24 8:12:30 pm GMT	University of Debrecen	4	I am aware that I do not have to take the UKMLA during my medical studies	10	N/A	10	10	1	10	10	10	ECG	I feel confident
Post-cardiology(1)	2024/09/24 8:12:33 pm GMT	cardiff	3	I am aware that I have to take the UKMLA during my medical studies	7	2026/2027	8	9	9	9	9	9	n/a	n/a
Post-cardiology(1)	2024/09/24 8:13:15 pm GMT	Barts and The London	5	I am aware that I have to take the UKMLA during my medical studies	5	2024/2025	5	5	5	5	5	5	management	neutral
Post-cardiology(1)	2024/09/24 8:14:20 pm GMT	Cardiff University	5	I am aware that I have to take the UKMLA during my medical studies	4	2024/2025	6	6	6	6	6	7	Specific conditions in different subjects	Still not great
Post-cardiology(1)	2024/09/24 8:14:32 pm GMT	UCL	6	I am aware that I have to take the UKMLA during my medical studies	10	2024/2025	7	6	7	9	6	7	Heart valve conditions	Better
Post-cardiology(1)	2024/09/24 8:15:56 pm GMT	Medical uni sofia	5	I am not aware if I have to / don't have to take the UKMLA during my medical studies	5	I am not sure	5	5	5	8	7	7	Study better	Better
Post-cardiology(1)	2024/09/24 8:17:05 pm GMT	Cardiff	3	I am aware that I have to take the UKMLA during my medical studies	6	2026/2027	6	6	9	10	4	4	Valve pathologies	A bit more confident especially with cardio content, and I know what to focus my revision on
Post-cardiology(1)	2024/09/24 8:19:35 pm GMT	CARDIFF	6	I am aware that I have to take the UKMLA during my medical studies	7	2024/2025	6	6	8	8	7	7	n/a	n/a
Post-cardiology(1)	2024/09/24 8:21:41 pm GMT	Medical university of silesia	6	I am not aware if I have to / don't have to take the UKMLA during my medical studies	7	I am not sure	3	3	6	8	5	5	The Coronary heart disease and valvular disease	A bit better as I have an idea of what to expect
Post-cardiology(1)	2024/09/24 8:22:07 pm GMT	University of Cambridge	6	I am aware that I have to take the UKMLA during my medical studies	6	2024/2025	8	7	6	8	7	9	Valvular diseases	More confident in cardiology
Post-cardiology(1)	2024/09/24 8:23:01 pm GMT	University of Sunderland	4	I am aware that I have to take the UKMLA during my medical studies	9	2024/2025	9	9	9	9	9	9	Valvular disease- need to make sure to review them	Much better
Post-cardiology(1)	2024/09/24 8:23:30 pm GMT	Swansea	2	I am not aware if I have to / don't have to take the UKMLA during my medical studies	2	I am not sure	3	3	4	10	3	3	Picking out key stem words	Not great
Post-cardiology(1)	2024/09/24 8:27:06 pm GMT	Cardiff Uni	5	I am aware that I have to take the UKMLA during my medical studies	10	2024/2025	7	8	10	7	9	8	i think fine details of management or classifications etc	okay
Post-cardiology(1)	2024/09/25 7:07:13 am GMT	Norwich medical school	5	I am aware that I have to take the UKMLA during my medical studies	8	2024/2025	8	8	4	9	10	8	N/A	Really useful thank you!
Post-cardiology(1)	2024/09/29 6:38:05 pm GMT	Swansea	2	I am not aware if I have to / don't have to take the UKMLA during my medical studies	2	I am not sure	3	3	6	10	4	4	Question style	Apprehensive
Post-cardiology(2)	2024/09/26 6:59:19 pm GMT	University of Liverpool	5	I am aware that I have to take the UKMLA during my medical studies	9	2024/2025	9	9	9	9	9	9	Was AAA screening	A lot more confident
Post-cardiology(2)	2024/09/26 7:02:51 pm GMT	a	5	I am aware that I have to take the UKMLA during my medical studies	5	2024/2025	5	10	0	10	2	9	a	a
Post-cardiology(2)	2024/09/26 7:02:58 pm GMT	Aberdeen	4	I am aware that I have to take the UKMLA during my medical studies	10	2024/2025	4	8	8	8	9	10	No	Better
Post-cardiology(2)	2024/09/26 7:03:34 pm GMT	uni of southampton	5	I am aware that I have to take the UKMLA during my medical studies	8	2024/2025	8	8	10	10	7	8	n/a	n/a
Post-cardiology(2)	2024/09/26 7:04:46 pm GMT	Barts and the London	5	I am aware that I have to take the UKMLA during my medical studies	6	2024/2025	6	6	6	6	6	6	vascular disease	not sure
Post-cardiology(2)	2024/09/26 7:06:42 pm GMT	SGUL	4	I am aware that I have to take the UKMLA during my medical studies	6	2026/2027	5	6	7	10	7	8	limited opportunities to practice - in the style required for OSCE	sessions like this are very helpful in boosting confidence / relieving anxiety
Post-cardiology(2)	2024/09/26 7:07:01 pm GMT	Cardiff University	3	I am aware that I have to take the UKMLA during my medical studies	3	2026/2027	3	4	5	7	3	4	N/A	good
Post-cardiology(2)	2024/09/26 7:09:15 pm GMT	MU SOFIA	5	I am not aware if I have to / don't have to take the UKMLA during my medical studies	5	I am not sure	5	5	5	7	5	6	NOTHING	GOOD
Post-cardiology(2)	2024/09/26 7:12:20 pm GMT	Cardiff	6	I am aware that I have to take the UKMLA during my medical studies	5	2025/2026	8	6	8	8	8	8	N/A	Still stressed, lots to cover!
Post-cardiology(2)	2024/09/26 7:16:04 pm GMT	Norwich Medical School	6	I am aware that I have to take the UKMLA during my medical studies	10	2024/2025	8	8	4	10	7	8	Antibiotics specifics	More confident with management and differentials and how to differentiate between
Post-cardiology(2)	2024/09/26 7:18:36 pm GMT	Leicester	5	I am aware that I have to take the UKMLA during my medical studies	7	2024/2025	8	5	6	9	5	6	N/A	N/A
Post-cardiology(2)	2024/09/26 7:18:37 pm GMT	University of debrecen	4	I am aware that I do not have to take the UKMLA during my medical studies	10	N/A	10	10	0	10	10	10	Drugs	good
Post-cardiology(2)	2024/09/26 7:19:17 pm GMT	UCL	6	I am aware that I have to take the UKMLA during my medical studies	8	2024/2025	7	7	7	10	7	8	cardiology	better
Post-cardiology(2)	2024/09/26 7:20:56 pm GMT	Medical University of Silesia	6	I am not aware if I have to / don't have to take the UKMLA during my medical studies	7	N/A	7	7	5	9	7	7	The investigations and the correct treatments	I fell like Iâ€™m able to learn a lot
Post-cardiology(2)	2024/09/26 7:21:03 pm GMT	Cardiff	4	I am aware that I have to take the UKMLA during my medical studies	5	2025/2026	6	6	6	6	5	6
Post-cardiology(2)	2024/09/26 7:21:50 pm GMT	medical university varna		I am aware that I have to take the UKMLA during my medical studies	10	2025/2026	10	10	2	10	10	10	none	none
Post-cardiology(2)	2024/09/26 7:22:10 pm GMT	Oxford	6	I am not aware if I have to / don't have to take the UKMLA during my medical studies	8	2024/2025	8	7	6	7	7	7	pl	ok
Post-cardiology(2)	2024/09/26 7:22:43 pm GMT	university of manchester	4	I am aware that I do not have to take the UKMLA during my medical studies	10	2027/2028	10	10	10	10	10	10	drugs management	stressed but working hard
Post-cardiology(2)	2024/09/26 7:23:07 pm GMT	University of Cambridge	6	I am aware that I have to take the UKMLA during my medical studies	7	2024/2025	8	8	5	6	6	8	N/A	N/A
Post-cardiology(2)	2024/09/26 7:23:12 pm GMT	Cam	6	I am aware that I have to take the UKMLA during my medical studies	8	2024/2025	8	8	5	8	8	8	ECG changes in pericarditis and Myo	Fine thanks
Post-cardiology(2)	2024/09/26 7:24:02 pm GMT	Zhejiang university		I am aware that I do not have to take the UKMLA during my medical studies	8	N/A	8	8	5	8	9	8	Clinical cases	Motivated
Post-cardiology(2)	2024/09/26 7:25:30 pm GMT	Newcastle University	5	I am aware that I have to take the UKMLA during my medical studies	7	2024/2025	2	2	10	10	4	2	Cardiology, Respiratory, Anaemia	Less scared
Post-cardiology(2)	2024/09/26 7:28:13 pm GMT	UFS	5	I am not aware if I have to / don't have to take the UKMLA during my medical studies	0	N/A	4	4	9	10	6	6	No gaps identified as yet	Anxious
Post-cardiology(2)	2024/09/26 7:36:09 pm GMT	dundee university	4	I am aware that I have to take the UKMLA during my medical studies	7	2024/2025	5	1	10	6	7	7	It is knowing complications and investigations for certain diagnosis	i feel slightly better then before{sorry just want to check ABPI values for critcal limb ischemia and acute limb threatening ischemia,were they swapped?i might be wrong). Thanks for the session!
Post-cardiology(2)	2024/09/26 7:40:22 pm GMT	Leicester	5	I am aware that I have to take the UKMLA during my medical studies	10	2025/2026	10	9	7	9	7	8	Great	Great
Post-cardiology(2)	2024/09/26 7:41:35 pm GMT	UEA	5	I am aware that I have to take the UKMLA during my medical studies	9	2024/2025	7	7	7	7	7	8	Valvular disease	Still nervous but youâ€™ve helped alot!
Post-cardiology(2)	2024/09/26 7:51:46 pm GMT	University of Sunderland	4	I am aware that I have to take the UKMLA during my medical studies	3	2025/2026	6	6	6	6	6	5	I got a better understanding between acute limb, and chronic limb ischaemia which I struggled with before	Still a bit nervous but I feel better knowing how to approach cardiology revision
Post-cardiology(2)	2024/09/26 7:53:27 pm GMT	Cardiff	3	I am aware that I have to take the UKMLA during my medical studies	3	2027/2028	4	7	5	6	4	6	N/a	N/a
Post-cardiology(2)	2024/09/26 7:54:11 pm GMT	Cardiff University	3	I am aware that I have to take the UKMLA during my medical studies	7	2026/2027	8	3	3	5	4	5	Heart murmurs	I'm not sure yet
Post-cardiology(2)	2024/09/26 8:23:08 pm GMT	Deakin	3	I am aware that I do not have to take the UKMLA during my medical studies	7	N/A	7	7	7	7	7	7	.	.
Post-cardiology(2)	2024/09/26 9:11:32 pm GMT	Cardiff University	5	I am aware that I have to take the UKMLA during my medical studies	7	2024/2025	7	7	7	7	7	7	n/a	better
Post-cardiology(2)	2024/10/11 11:11:10 pm GMT	Nottingham	4	I am aware that I have to take the UKMLA during my medical studies	8	2025/2026	6	8	7	8	8	8
Post-respiratory(2)	2024/10/06 5:51:55 pm GMT	UCL	6	I am aware that I have to take the UKMLA during my medical studies	10	2024/2025	10	10	10	10	10	10	good	GOOD
Post-respiratory(2)	2024/10/06 5:51:56 pm GMT	Cardiff	5	I am aware that I have to take the UKMLA during my medical studies	8	2024/2025	8	8	6	9	7	7	Conditions not common on passmed	Okay
Post-respiratory(2)	2024/10/06 5:52:41 pm GMT	Ulster University	4	I am aware that I have to take the UKMLA during my medical studies	8	2024/2025	6	6	2	8	6	7	None	Thought it was very beneficial
Post-respiratory(2)	2024/10/06 5:52:48 pm GMT	leicester	6	I am aware that I have to take the UKMLA during my medical studies	10	2025/2026	6	8	8	9	9	9	/	/
Post-respiratory(2)	2024/10/06 5:53:18 pm GMT	Cardiff University	5	I am aware that I have to take the UKMLA during my medical studies	6	2024/2025	7	8	8	7	7	8	Pharmacology	ok
Post-respiratory(2)	2024/10/06 5:53:41 pm GMT	UCL	6	I am aware that I have to take the UKMLA during my medical studies	9	2024/2025	8	8	5	8	8	8	pulmonary hypertension classification	good
Post-respiratory(2)	2024/10/06 5:53:41 pm GMT	University of Cambridge	6	I am aware that I have to take the UKMLA during my medical studies	7	2024/2025	8	8	5	6	7	7	pulmonary hypertension classification	n/a
Post-respiratory(2)	2024/10/06 5:53:56 pm GMT	UCL	6	I am aware that I have to take the UKMLA during my medical studies	7	2024/2025	7	7	7	7	7	6	Pulmonary hypertension	Good
Post-respiratory(2)	2024/10/06 5:55:07 pm GMT	Sheffield	5	I am aware that I have to take the UKMLA during my medical studies	8	2024/2025	6	6	6	7	7	7
Post-respiratory(2)	2024/10/06 5:55:22 pm GMT	Queens University Belfast	4	I am aware that I have to take the UKMLA during my medical studies	6	2026/2027	6	4	9	9	7	8	I need to know the drugs	I feel I need to review more things
Post-respiratory(2)	2024/10/06 5:55:24 pm GMT	National Ribat University		I am not aware if I have to / don't have to take the UKMLA during my medical studies	0	I am not sure	7	0	4	8	0	1	Some	Alright
Post-respiratory(2)	2024/10/06 5:56:49 pm GMT	ARU	5	I am not aware if I have to / don't have to take the UKMLA during my medical studies	4	I am not sure	10	10	10	10	10	10	Unknown	Ok
Post-respiratory(2)	2024/10/06 5:57:24 pm GMT	UoM	5	I am aware that I have to take the UKMLA during my medical studies	8	2024/2025	8	7	5	9	7	8	.	OKay
Post-respiratory(2)	2024/10/06 5:57:46 pm GMT	NKUA	6	I am not aware if I have to / don't have to take the UKMLA during my medical studies	9	I am not sure	8	8	8	8	8	8	NOTHING	PERFECT
Post-respiratory(2)	2024/10/06 5:57:47 pm GMT	university of aberdeen	2	I am aware that I have to take the UKMLA during my medical studies	3	I am not sure	2	4	4	4	4	4	not knowing the treatment plans	less nervous
Post-respiratory(2)	2024/10/06 5:58:28 pm GMT	Dundee university	4	I am aware that I have to take the UKMLA during my medical studies	6	2024/2025	6	6	10	5	6	6	it was knowing complications of the diseases	a bit better , thank you
Post-respiratory(2)	2024/10/06 5:58:47 pm GMT	University of Aberdeen	3	I am aware that I have to take the UKMLA during my medical studies	6	I am not sure	5	5	5	5	5	5	Not sure	Neutral
Post-respiratory(2)	2024/10/06 6:01:11 pm GMT	cardiff	5	I am aware that I have to take the UKMLA during my medical studies	5	2024/2025	5	9	7	8	9	9	nada	fine
Post-respiratory(2)	2024/10/06 6:05:33 pm GMT	University of Southampton	5	I am aware that I have to take the UKMLA during my medical studies	8	2024/2025	6	6	7	8	5	7	N/A	Anxious but motivated
Post-respiratory(2)	2024/10/06 6:15:15 pm GMT	UCL	6	I am aware that I have to take the UKMLA during my medical studies	8	2024/2025	7	7	7	8	8	8	-	-
Post-gastroenterology(1)	2024/10/08 7:28:12 pm GMT	cardiff	3	I am aware that I have to take the UKMLA during my medical studies	4	2027/2028	5	5	5	5	5	5	anemia	better
Post-gastroenterology(1)	2024/10/08 7:28:24 pm GMT	Leicester	6	I am aware that I have to take the UKMLA during my medical studies	8	2024/2025	7	7	7	7	8	8	uc/crohns	much better
Post-gastroenterology(1)	2024/10/08 7:28:26 pm GMT	Cardiff	3	I am aware that I have to take the UKMLA during my medical studies	8	2026/2027	4	4	4	4	5	4	A lot	Ok
Post-gastroenterology(1)	2024/10/08 7:28:32 pm GMT	cardiff	3	I am aware that I have to take the UKMLA during my medical studies	4	2026/2027	4	8	5	6	6	6	n/a	n/a
Post-gastroenterology(1)	2024/10/08 7:28:33 pm GMT	cardiff	4	I am aware that I have to take the UKMLA during my medical studies	5	2025/2026	0	0	0	0	0	0	-	-
Post-gastroenterology(1)	2024/10/08 7:28:34 pm GMT	Nottingham	4	I am aware that I have to take the UKMLA during my medical studies	8	2025/2026	8	8	8	10	9	8	which conditions to know	more confident
Post-gastroenterology(1)	2024/10/08 7:28:36 pm GMT	University of leeds	5	I am aware that I have to take the UKMLA during my medical studies	9	2024/2025	7	8	5	10	8	6	Applying knowledge to exam questions	Much better equipped
Post-gastroenterology(1)	2024/10/08 7:28:39 pm GMT	Manchester	5	I am aware that I have to take the UKMLA during my medical studies	5	2024/2025	5	5	5	5	5	5	Renal	Okay
Post-gastroenterology(1)	2024/10/08 7:28:42 pm GMT	cardiff	3	I am aware that I have to take the UKMLA during my medical studies	6	2026/2027	4	3	3	7	5	0	-	-
Post-gastroenterology(1)	2024/10/08 7:28:42 pm GMT	UoL	5	I am aware that I have to take the UKMLA during my medical studies	8	2024/2025	7	7	7	8	8	8	Gatro	Scared
Post-gastroenterology(1)	2024/10/08 7:28:44 pm GMT	uob	6	I am aware that I have to take the UKMLA during my medical studies	8	2024/2025	7	7	7	8	8	8	-	better
Post-gastroenterology(1)	2024/10/08 7:28:45 pm GMT	Cambridge	6	I am aware that I have to take the UKMLA during my medical studies	8	2025/2026	9	8	9	10	8	6	Surgical emergencies	Nervous
Post-gastroenterology(1)	2024/10/08 7:28:48 pm GMT	Barts	5	I am aware that I have to take the UKMLA during my medical studies	7	2024/2025	6	2	10	5	5	3	surgical, year 3 gastro content	slightly more stressed because theres alot i dont know
Post-gastroenterology(1)	2024/10/08 7:28:49 pm GMT	Melbourne University	2	I am aware that I do not have to take the UKMLA during my medical studies	0	N/A	0	0	0	0	0	0	None, Australian student.	None, Australian student.
Post-gastroenterology(1)	2024/10/08 7:28:53 pm GMT	Edinburgh	6	I am aware that I have to take the UKMLA during my medical studies	8	2024/2025	7	7	10	7	7	6	Ischaemic mesenteric adenitis	More prepared after this session
Post-gastroenterology(1)	2024/10/08 7:29:02 pm GMT	Kingâ€™s College London	2	I am aware that I have to take the UKMLA during my medical studies	7	2027/2028	5	5	4	10	4	2	The breadth of conditions and generally well informed on the conditions covered	More confidence with Gastro so thank you
Post-gastroenterology(1)	2024/10/08 7:29:03 pm GMT	Newcastle University	5	I am aware that I have to take the UKMLA during my medical studies	8	2024/2025	3	6	10	6	7	4	Long-tern conditions	Scared
Post-gastroenterology(1)	2024/10/08 7:29:03 pm GMT	SGUL	4	I am aware that I have to take the UKMLA during my medical studies	7	2026/2027	7	7	10	10	9	6	ddx	still anxious
Post-gastroenterology(1)	2024/10/08 7:29:04 pm GMT	University of Surrey	2	I am aware that I do not have to take the UKMLA during my medical studies	7	2024/2025	8	8	8	8	8	8	pharmaceutical management	NA to me as I'm a PA student
Post-gastroenterology(1)	2024/10/08 7:29:04 pm GMT	cardiff	3	I am aware that I have to take the UKMLA during my medical studies	6	2026/2027	4	4	8	8	5	5	GI Cancer treatment	more informed
Post-gastroenterology(1)	2024/10/08 7:29:06 pm GMT	Cardiff University	3	I am aware that I have to take the UKMLA during my medical studies	3	2026/2027	3	3	4	5	3	3	N/A	good
Post-gastroenterology(1)	2024/10/08 7:29:07 pm GMT	University of Aberdeen	3	I am aware that I have to take the UKMLA during my medical studies	7	2026/2027	6	3	7	7	4	3	Bowel obstruction	Feel like I'm one step closer
Post-gastroenterology(1)	2024/10/08 7:29:17 pm GMT	Cardiff	3	I am aware that I have to take the UKMLA during my medical studies	4	2026/2027	3	4	3	6	3	2	Surgical management	Know more than before!
Post-gastroenterology(1)	2024/10/08 7:29:30 pm GMT	Cardiff Uni	6	I am aware that I have to take the UKMLA during my medical studies	10	2024/2025	7	7	8	8	10	8	breadth of topics	ok
Post-gastroenterology(1)	2024/10/08 7:29:46 pm GMT	NKUA	6	I am aware that I have to take the UKMLA during my medical studies	8	I am not sure	9	9	5	8	8	8	NOTHING MAJOR. THANK YOU FOR THE EFFORT	AWSOME
Post-gastroenterology(1)	2024/10/08 7:29:56 pm GMT	University of Liverpool	5	I am aware that I have to take the UKMLA during my medical studies	10	2024/2025	10	8	10	10	7	8	obturator hernias	A lot more confident! Thank you
Post-gastroenterology(1)	2024/10/08 7:29:57 pm GMT	Queens university Belfast	4	I am aware that I have to take the UKMLA during my medical studies	4	2025/2026	8	6	10	8	9	8	Knowing the anatomy	It was a great session! I have things to revise but I till refer to this to improve my knowledge and feel more confident
Post-gastroenterology(1)	2024/10/08 7:29:58 pm GMT	UoAberdeen	3	I am aware that I have to take the UKMLA during my medical studies	4	2027/2028	2	3	10	10	2	4	need to get more indepth info on diseases	scared still
Post-gastroenterology(1)	2024/10/08 7:30:06 pm GMT	Norwich Medical School (UEA)	6	I am aware that I have to take the UKMLA during my medical studies	10	2024/2025	8	7	3	10	7	7	Surgeries	More confident with IBD
Post-gastroenterology(1)	2024/10/08 7:30:46 pm GMT	University		I am not aware if I have to / don't have to take the UKMLA during my medical studies	5	N/A	5	5	5	5	5	5	Discussions	Helpful
Post-gastroenterology(1)	2024/10/08 7:31:07 pm GMT	Barts and The London	6	I am aware that I have to take the UKMLA during my medical studies	9	2024/2025	9	8	6	10	9	8	-	-
Post-gastroenterology(1)	2024/10/08 7:31:45 pm GMT	NKUA	6	I am aware that I do not have to take the UKMLA during my medical studies	7	I am not sure	8	8	4	8	8	8	EVERYTHING LINKED PERFECTLY WITH PREEXISTING KNOWLEDGE	PEERFECT
Post-gastroenterology(1)	2024/10/08 7:33:43 pm GMT	Dundee university	4	I am aware that I have to take the UKMLA during my medical studies	6	2024/2025	6	6	10	7	3	5	It was the Mx and Ix for the conditions	It is alright
Post-gastroenterology(1)	2024/10/08 7:34:12 pm GMT	KCL GKT	2	I am aware that I have to take the UKMLA during my medical studies	5	2027/2028	3	3	5	9	3	1	There's a lot...	I'll be ready to do it after 3 and a half years
Post-gastroenterology(1)	2024/10/08 7:45:58 pm GMT	Dundee University	4	I am aware that I have to take the UKMLA during my medical studies	7	2024/2025	7	6	5	10	8	8	Surgical topics	A bit more confident now
Post-gastroenterology(1)	2024/10/10 11:27:00 am GMT	cardiff	3	I am aware that I have to take the UKMLA during my medical studies	4	2026/2027	4	4	5	5	6	8	n/a	n/a
Post-gastroenterology(2)	2024/10/10 7:32:24 pm GMT	UOM	2	I am aware that I have to take the UKMLA during my medical studies	8	2024/2025	8	8	8	9	9	9	yes	Very useful and informative session
Post-gastroenterology(2)	2024/10/10 7:32:54 pm GMT	University of Sunderland	4	I am aware that I have to take the UKMLA during my medical studies	10	2024/2025	10	10	10	10	10	10	Need to review when to manage with mediations and when to investigate further	Better equipped to tackle the MLA
Post-gastroenterology(2)	2024/10/10 7:33:11 pm GMT	SGUL	4	I am aware that I have to take the UKMLA during my medical studies	8	2026/2027	5	5	10	10	7	7	DDxs	anxious
Post-gastroenterology(2)	2024/10/10 7:33:25 pm GMT	Edinburgh	6	I am aware that I have to take the UKMLA during my medical studies	7	2024/2025	7	7	9	7	8	8	Boerhaave syndrome	Better prepared after this
Post-gastroenterology(2)	2024/10/10 7:34:47 pm GMT	cardiff	3	I am aware that I have to take the UKMLA during my medical studies	4	2026/2027	3	3	10	2	2	2	-	-
Post-gastroenterology(2)	2024/10/10 7:35:16 pm GMT	Leeds	5	I am aware that I have to take the UKMLA during my medical studies	9	2024/2025	9	9	3	8	8	9	Bleeding scores	More confident!
Post-gastroenterology(2)	2024/10/10 7:35:17 pm GMT	UoSouthampton	5	I am aware that I have to take the UKMLA during my medical studies	8	2024/2025	8	7	6	10	7	8	Diagnostic investigations	Better
Post-gastroenterology(2)	2024/10/10 7:36:05 pm GMT	Cardiff University	3	I am aware that I have to take the UKMLA during my medical studies	8	2026/2027	8	8	5	10	6	10	management strategies for some of the oesophageal pathologies	Not nervous yet, I still have a few years!
Post-gastroenterology(2)	2024/10/10 7:36:54 pm GMT	UoL	3	I am aware that I have to take the UKMLA during my medical studies	8	2025/2026	6	6	6	6	6	6	.	Ok
Post-gastroenterology(2)	2024/10/10 7:50:14 pm GMT	University of Manchester		I am aware that I do not have to take the UKMLA during my medical studies	2	N/A	6	7	10	7	5	7	C diff.	Amazing
Post-gastroenterology(2)	2024/10/10 7:50:46 pm GMT	university of aberdeen	2	I am aware that I have to take the UKMLA during my medical studies	5	I am not sure	3	3	2	7	5	5	management plans	nervous
Post-gastroenterology(2)	2024/10/10 7:51:08 pm GMT	Uni of leeds	5	I am aware that I have to take the UKMLA during my medical studies	8	2024/2025	8	8	8	8	8	8	N/a	N/a
Post-gastroenterology(2)	2024/10/10 7:52:44 pm GMT	Newcastle University	5	I am aware that I have to take the UKMLA during my medical studies	7	2024/2025	6	7	10	8	6	8	N/D	Scared
Post-gastroenterology(2)	2024/10/10 7:55:56 pm GMT	Barts and the london	5	I am aware that I have to take the UKMLA during my medical studies	7	2024/2025	8	8	5	10	8	6	Gastro	Okay
Post-gastroenterology(2)	2024/10/10 8:01:46 pm GMT	Cardiff University	5	I am aware that I have to take the UKMLA during my medical studies	6	2024/2025	7	7	9	7	7	7	Pharmacy	Less scared
Post-hepatology	2024/10/15 7:36:33 pm GMT	kcl	5	I am aware that I have to take the UKMLA during my medical studies	7	2024/2025	7	4	7	7	7	6	-	-
Post-hepatology	2024/10/15 7:36:34 pm GMT	Aberdeen	4	I am aware that I have to take the UKMLA during my medical studies	8	2025/2026	10	10	6	10	10	10	Vg	Good
Post-hepatology	2024/10/15 7:37:22 pm GMT	SGUL	4	I am aware that I have to take the UKMLA during my medical studies	8	2026/2027	7	7	10	10	7	7	SESSION NOT CLOSELY ALIGNED TO MLA - TOO MUCH SUPERFLUOUS DETAIL	STILL ANXIOUS
Post-hepatology	2024/10/15 7:37:40 pm GMT	AMA	1	I am aware that I have to take the UKMLA during my medical studies	8	2027/2028	8	8	8	8	9	8	The preparation time	Anxious
Post-hepatology	2024/10/15 7:43:35 pm GMT	Instituto Superior de CiÃªncias e Tecnologias de MoÃ§ambique	5	I am not aware if I have to / don't have to take the UKMLA during my medical studies	0	I am not sure	0	0	0	8	0	6	I dont know	I find it useful
Post-hepatology	2024/10/15 7:43:58 pm GMT	Liverpool	5	I am aware that I have to take the UKMLA during my medical studies	7	2024/2025	8	8	8	8	8	9	Interpretation	Good
Post-hepatology	2024/10/15 7:48:00 pm GMT	University of Southampton	6	I am aware that I have to take the UKMLA during my medical studies	10	2024/2025	8	8	4	10	8	8	N/A	Good
Post-hepatology	2024/10/15 7:51:49 pm GMT	Glasgow	6	I am aware that I have to take the UKMLA during my medical studies	7	2024/2025	7	7	4	10	8	9	none	good, motivated, relaxed, tired
Post-hepatology	2024/10/15 7:53:30 pm GMT	UoL	5	I am aware that I have to take the UKMLA during my medical studies	4	2024/2025	7	7	7	7	7	7	questions	okay
Post-hepatology	2024/10/15 7:54:23 pm GMT	Ulster University	4	I am aware that I have to take the UKMLA during my medical studies	7	2024/2025	6	6	3	10	6	7	n/a	better
Post-hepatology	2024/10/15 7:54:43 pm GMT	Cardiff university	3	I am aware that I have to take the UKMLA during my medical studies	8	2026/2027	7	7	7	10	7	9	proper SBA technique	Not too worried, I have a few years yet!
Post-hepatology	2024/10/15 7:55:24 pm GMT	university of aberdeen	2	I am aware that I have to take the UKMLA during my medical studies	5	I am not sure	5	5	5	5	6	7	management plans	bit nervous
Post-hepatology	2024/10/15 7:55:41 pm GMT	Glasgow	4	I am aware that I have to take the UKMLA during my medical studies	8	2025/2026	5	5	10	10	5	8	I realised I had not covered paracetamol overdose, SBP or hepatic encephalopathy well.	Nervous but have until next year
Post-hepatology	2024/10/15 7:57:15 pm GMT	Barts and the London	5	I am aware that I have to take the UKMLA during my medical studies	10	2024/2025	10	10	1	10	8	10	obstetrics	okay
Post-hepatology	2024/10/15 7:59:19 pm GMT	UOM	2	I am aware that I have to take the UKMLA during my medical studies	7	2024/2025	9	9	9	9	9	9	no	much better
Post-hepatology	2024/10/15 7:59:31 pm GMT	UoM	5	I am aware that I have to take the UKMLA during my medical studies	8	2024/2025	8	6	7	10	7	6	drug over doses	Better
Post-hepatology	2024/10/15 8:05:52 pm GMT	University of Leeds	6	I am aware that I have to take the UKMLA during my medical studies	6	2024/2025	7	5	2	10	4	6	Basics still but for other areas	Nervous
Post-hepatology	2024/10/16 7:09:01 am GMT	Cardiff University	5	I am aware that I have to take the UKMLA during my medical studies	6	2024/2025	7	7	7	7	7	4	Pharmacy	OK
Post-neurology(2)	2024/10/24 7:17:53 pm GMT	UOM	2	I am aware that I have to take the UKMLA during my medical studies	8	2024/2025	8	8	8	9	9	9	none	better
Post-neurology(2)	2024/10/24 7:18:10 pm GMT	Nottingham	4	I am aware that I have to take the UKMLA during my medical studies	9	2025/2026	9	9	3	6	7	9	n/a	n/a
Post-neurology(2)	2024/10/24 7:19:00 pm GMT	NKUA	6	I am aware that I do not have to take the UKMLA during my medical studies	8	I am not sure	8	8	7	9	8	8	EVERYTHING CLEAR	I AM NOT TAKING IT. I JUST ENJOY TO LEARN THROUGH YOUR LECTURES
Post-neurology(2)	2024/10/24 7:19:10 pm GMT	Barts	5	I am aware that I have to take the UKMLA during my medical studies	9	2024/2025	8	8	3	10	7	8	Neurological conditions presentations	Okay
Post-neurology(2)	2024/10/24 7:19:17 pm GMT	Glasgow	5	I am aware that I have to take the UKMLA during my medical studies	8	2024/2025	6	5	6	9	7	6	idk	idk
Post-neurology(2)	2024/10/24 7:19:20 pm GMT	hull york medical school	5	I am aware that I have to take the UKMLA during my medical studies	10	2025/2026	10	10	10	10	10	10	n.a	more confident in topics discussed
Post-neurology(2)	2024/10/24 7:20:19 pm GMT	Ulster University	5	I am aware that I have to take the UKMLA during my medical studies	8	2024/2025	6	7	7	9	7	7	neuroanatomy	better about clinical presentations of neurology conditions
Post-neurology(2)	2024/10/24 7:22:13 pm GMT	SGUL	4	I am aware that I have to take the UKMLA during my medical studies	7	2025/2026	6	6	10	10	7	7	Developing DDx's	still anxious
Post-neurology(2)	2024/10/24 7:26:11 pm GMT	leeds	4	I am aware that I have to take the UKMLA during my medical studies	6	2025/2026	7	4	7	5	6	6	-	aprehensive
Post-neurology(2)	2024/10/24 7:32:54 pm GMT	Leeds	5	I am aware that I have to take the UKMLA during my medical studies	8	2024/2025	8	8	8	8	8	8	MSK	Better
Post-neurology(2)	2024/10/24 7:51:04 pm GMT	Newcastle University	5	I am aware that I have to take the UKMLA during my medical studies	6	2024/2025	5	6	10	4	6	6	N/A	Still scared, less than before
Post-gynaecology	2024/11/07 9:10:01 pm CET	Mansoura	5	I am aware that I do not have to take the UKMLA during my medical studies	10	I am not sure	10	10	10	10	10	10	U	U
Post-gynaecology	2024/11/07 9:11:36 pm CET	glasgow	5	I am aware that I have to take the UKMLA during my medical studies	6	2024/2025	8	9	9	10	5	4	hard to figure out everything u need to know	well explained more demystified
Post-gynaecology	2024/11/07 9:11:44 pm CET	cardiff	4	I am aware that I have to take the UKMLA during my medical studies	7	2025/2026	7	7	9	10	5	9	neuro	more confident
Post-gynaecology	2024/11/07 9:17:46 pm CET	Norwich medical school	4	I am aware that I have to take the UKMLA during my medical studies	7	2026/2027	7	7	6	6	7	9	First line treatment especially cancers and the stages of cancers	A bit more confident but still need revision
Post-gynaecology	2024/11/07 9:18:23 pm CET	SGUL	4	I am aware that I have to take the UKMLA during my medical studies	6	2025/2026	5	5	10	10	7	8	DDX DEVELOPMENT	still anxious
Post-gynaecology	2024/11/07 9:18:39 pm CET	Barts and The London	6	I am aware that I have to take the UKMLA during my medical studies	9	2024/2025	9	7	7	10	8	9	Anaesthesia and critical care topics	Confident
Post-gynaecology	2024/11/07 9:18:57 pm CET	Cardiff	5	I am aware that I have to take the UKMLA during my medical studies	9	2024/2025	9	9	7	9	9	9	Unsure	Unsure
Post-gynaecology	2024/11/07 9:26:38 pm CET	Cardiff	5	I am aware that I have to take the UKMLA during my medical studies	8	2024/2025	7	7	7	7	7	7	NICE guidelines (especially schedules, statistics and non-medical management plans)	Still stressed, but the session was very informative and helpful, thank you!
Post-gynaecology	2024/11/07 9:30:59 pm CET	UoSouthampton	5	I am aware that I have to take the UKMLA during my medical studies	7	2024/2025	7	7	8	10	7	8	N	N
Post-gynaecology	2024/11/07 9:34:45 pm CET	University of Manchester		I am aware that I have to take the UKMLA during my medical studies	6	I am not sure	8	7	6	7	5	5	Management for conditions	Na
Post-gynaecology	2024/11/07 9:51:43 pm CET	Barts	5	I am aware that I have to take the UKMLA during my medical studies	9	2024/2025	8	8	3	10	8	8	order of investigations and management for gynaecological conditions	okay
Post-paediatrics(1)	2024/10/29 9:38:18 pm CET	Hyms	5	I am aware that I have to take the UKMLA during my medical studies	10	2025/2026	10	10	10	10	10	10	n.a	Great revision!
Post-paediatrics(1)	2024/10/29 9:38:24 pm CET	Aberdeen	4	I am aware that I have to take the UKMLA during my medical studies	7	2024/2025	8	8	8	9	10	10	Kk	Better
Post-paediatrics(1)	2024/10/29 9:38:29 pm CET	Cardiff University	3	I am aware that I have to take the UKMLA during my medical studies	7	2026/2027	6	7	7	8	8	7	N/a	Still need more time to revise for it
Post-paediatrics(1)	2024/10/29 9:39:54 pm CET	UoM	5	I am aware that I have to take the UKMLA during my medical studies	7	2024/2025	7	6	8	9	7	6	Syndromic conditions	OK
Post-paediatrics(1)	2024/10/29 9:40:04 pm CET	southampton	5	I am aware that I have to take the UKMLA during my medical studies	7	2024/2025	6	6	10	10	6	5	na	na
Post-paediatrics(1)	2024/10/29 9:40:09 pm CET	Ulster University	4	I am aware that I have to take the UKMLA during my medical studies	7	2024/2025	7	7	3	10	7	8	specific paediatric conditions	more confident surrounding paeds topics
Post-paediatrics(1)	2024/10/29 9:40:18 pm CET	Aston Medical school	3	I am aware that I have to take the UKMLA during my medical studies	4	2026/2027	5	5	6	9	6	3	Being in 3rd year i haven't learned a lot of paediatrics yet so ive got a lot of gaps	would want to continue taking these sessions more
Post-paediatrics(1)	2024/10/29 9:40:27 pm CET	Manchester	5	I am aware that I have to take the UKMLA during my medical studies	6	2024/2025	4	4	7	10	5	4	Chromosomal abnormalities and infections. Epidemiology of paediatrics conditions.	worried that I really don't know my paediatrics content! It was just before my exams last year so I guess my time was divided with generally revising so it didn't absorb as well. this was a very good teaching session because it made me realise all of these issues and provided really highly useful information. Thank you for this session - if you could run a third session later maybe going by age, …
Post-paediatrics(1)	2024/10/29 9:41:23 pm CET	Barts	5	I am aware that I have to take the UKMLA during my medical studies	9	2024/2025	8	8	4	10	8	9	Cardiac abnormalities and their presentation and treatment	Okay
Post-paediatrics(1)	2024/10/29 9:42:29 pm CET	Southampton	6	I am aware that I have to take the UKMLA during my medical studies	9	2024/2025	8	8	3	10	6	7	paediatric genetic conditions	more confident
Post-paediatrics(1)	2024/10/29 9:42:32 pm CET	UCL medical school	5	I am aware that I have to take the UKMLA during my medical studies	6	2025/2026	8	6	3	10	5	8		Unsure - still a while away
Post-paediatrics(1)	2024/10/29 9:42:50 pm CET	NKUA	6	I am aware that I do not have to take the UKMLA during my medical studies	9	I am not sure	8	9	7	8	8	9	EVERYTHING WAS CLEAR	Love these sessions

## Sheet: UKMLA Table FINAL
					Mann-Whitney test comparing Pre and Post session responses
	Variable	Descriptive statistic	Pre-Session (n= 224)	Post-session (n=272)	P-Value	Significance
	Medical School Year	Mean (±SD):	4.50 (±1.08)	4.55 (±1.14)	0.4362	ns
		Median (IQR):	5 (1)	5 (1)
		Range (Min-Max):	5(6-1)	5 (6-1)
	Understanding of UKMLA	Mean (±SD):	6.17 (±2..21)	7.08 (±2.07)	<0.0001	****
		Median (IQR):	6 (3)	7 (2)									10.4.2
		Range (Min-Max):	10 (10-0)	10 (10-0)
	Confidence of passing the UKMLA	Mean (±SD):	5.31 (±2.22)	6.75 (±1.98)	<0.0001	****
		Median (IQR):	6 (3)	7 (2)									10.6.1.892
		Range (Min-Max):	10 (10-0)	10 (10-0)
	Preparedness for passing UKMLA	Mean (±SD):	5.18 (±2.22)	6.63 (±2.074)	<0.0001	****
		Median (IQR):	5 (3)	7 (3)
		Range (Min-Max):	10 (10-0)	10 (10-0)
	Anxiety for passing UKMLA	Mean (±SD):	7.50 (±2.23)	6.60 (±2.48)	<0.0001	****
		Median (IQR):	8 (4)	7 (4)
		Range (Min-Max):	10 (10-0)	10 (10-0)
	Motivativation for attending UKMLA focued events	Mean (±SD):	7.63 (±2.39)	8.30 (±1.85)	0.0058	**
		Median (IQR):	8 (4)	9 (3)
		Range (Min-Max):	10 (10-0)	10 (10-0)
	Overall UKMLA knowledge	Mean (±SD):	5.49 (±2.08)	6.82 (±2.00)	<0.0001	****
		Median (IQR):	6 (2)	7 (2)
		Range (Min-Max):	10 (10-0)	10 (10-0)
	Topic specific UKMLA knowledge	Mean (±SD):	5.08 (±2.14)	7.05 (±2.03)	<0.0001	****
		Median (IQR):	5 (2)	7 (2)
		Range (Min-Max):	10 (10-0)	10 (10-0)
	Note: SD = Standard Deviation; IQR = Inter Quartile Range; ns = Not Significant; ** P value <0.01; ****P value <0.0001 = Significant

## Sheet: UKMLA Graph
				Proportion
				Pre-session
			UKMLA being a requirement of their course	434
			UKMLA not being a requirement of their course	31
			Student unsure if UKMLA not being a requirement of their course	31

## Sheet: Emotions towards UKMLA Themes
Pre-sessionWhat are some significant gaps you have identified in your knowledge in preparing for the UKMLA pre-session?	Pre-session Themes Analysis	Post-session What are some significant gaps you have identified in your knowledge in preparing for the UKMLA post-session?	Post-session Themes Analysis
Anxious little bit	Anxiety	Anxious	Anxiety
Anxious	Anxiety	good	Good
worried	Worried	better	Good
NA	None	Would like more revision sessions	Worried
STRESSED	Stress	Unsure but the session was helpful for building confidence around the subject	Not sure
good for knowing where i stand	Good	worried	Worried
-	None	I do not feel very confident but I am motivated to keep learning.	Motivated
Not confident	Stress	Okayish	Okay
Okay	Okay	give me the slides the feedback form wont load properly	Good
nervous	Nervous	Good	Good
I found the session a helpful revision/learning tool. It has helped me become more familiar with types of exam questions and identify gaps in my knowledge.	Good	bit better	Good
Panic	Anxiety	Na	None
Nervous	Nervous	okay	Okay
Anxious	Anxiety	-	None
Stressed	Stress	Its helpful	Good
-	None	nervous	Nervous
Enthusiastic, looking for many sources to choose by the end of my medical year which journey I should be following..	Good	Much more confident with Diabetic drugs!	Confident
-	None	More reassured	Reassured
Anxious	Anxiety	nervous but better at SBAs	Nervous
stressed	Stress	Better about endo Qs	Good
NA	None	3 more years of work should prepare me adequately	Good
Prepared	Good	Good	Good
Great	Great	Happy	Good
Stressed	Stress	Alright ish	Okay
Anxious	Anxiety	not too bad	Okay
worried	Worried	-	None
Scared	Scared		None
-	None	Na	None
good?	Good	Dont want to	Not sure
Scared	Scared	Great teaching, extremely useful, great teacher and detail (some sessions are less detailed/ challenging and not as good- but this teacher is really excellent). Thanks	Great
-	None	More prepared	Confident
-	None	feel more confident	Confident
anxious	Anxiety	Okay	Okay
unsure	Not sure	Little less anxious	Good
Stressed	Stress	n/a	None
.	None	Good	Good
Still worried, but the session was very informative and helpful, thank you!	Stress	N/a	None
Not really sure	Not sure	N/A	None
Still stressed, but the session was very informative and helpful, thank you!	Stress	okay	Okay
O	Okay	Nervous	Nervous
nervous	Nervous	nervous	Nervous
More confident about the written exam aspect than the OSCE aspect	Confident	I will do my best as usual but unsure of confidence of passing	Good
awful	Awful	better	Good
Good session for me since paeds is my week area	Good	A bit more confident about general paeds topics	Good
	None	...	None
n.a	None	Still worried but it was a very good session	Stress
N/A	None	More confident in paediatric content	Confident
Semi	Stress	Okay	Okay
n/a	None	Still have a lot to cover	Anxiety
Stresssed	Stress	Anxious	Anxiety
Good	Good	good, equipped	Good
Excited to fill in my gaps of knowledge	Excited	Not ready quite yet but i feel more confident about the topics covered today	Anxiety
very anxious	Anxiety	Really good, speaker was very good and inputted all the key and relevant information.	Confident
I DO NOT HAVE TO I JUST ATTEND FOR MY OWN KNOWLEDGE	None	nervous as hell but will go back these notes for help for sure	Nervous
Scared	Scared	more prepared	Confident
n.a	None	anxious still	Anxiety
Anxious	Anxiety	more confident especially revising common topics in neurology	Confident
Anxious	Anxiety	I ADORE THESE SESSIONS. KEEP UPP THE GREAT WORK	Good
Nervous	Nervous	N/A	None
Very nervous!	Anxiety	n.a	None
Good, to get equipped with knowledge needed for it.	Good	still ages away mate	Good
N/A	None	This was an excellent sessions and great for finals revision	Confident
Scared	Scared	Okay	Okay
anxious	Anxiety	anxious and terrified	Anxiety
nervous	Nervous	Good	Good
Anxious	Anxiety	Not great	Anxiety
Not sure yet	Not sure	Anxious	Anxiety
Stressed out	Stress	OK	Okay
Not good	Stress	ok	Okay
Nervous but theres a lot of time to go!!	Nervous	Much better regarding the content I know, where to focus revision, and strategies that I can use to answer questions (eg: using details in the question stem to rule out potential answers and choose the most likely options among those remaining).	Great
lightly nervous	Nervous	much better	Great
n/a	None	GOOF	Good
stressed	Stress	Feeling more positive about psychiatry	Confident
nervous	Nervous	better	Good
Uneasy - its too new	Anxiety	Motivated	Motivated
not too bad, will hopefully be similar to previous exams	Okay	Definitely better! great delivery of a lot of content in a short space of time!!	Confident
anxiious	Anxiety	Pretty confident	Confident
Scared	Scared	STRESSED	Stress
a bit nervous as its coming up soon	Nervous	motivated	Motivated
Okay	Okay	N/A	None
Anxious	Anxiety	A bit more confident	Good
Okay but need to start preparing	Okay	Apprehensive but more confident	Confident
Is what it is	Not sure	good	Good
Good	Good	Alright	Okay
Worried	Worried	improved confidence	Confident
scared	Scared	/	None
ok	Okay	Apprehension	Apprehensive
good	Good	not yet	Okay
Unprepared	Underprepared	more confident	Confident
Scared	Scared	Worried	Worried
scared	Scared	Anxious	Anxiety
Feeling good to get started	Good	Great	Great
lack of understanding of the UKMLA	Not sure	-	None
Our medical school has used MLA style questions for our end of year exams since first year so I do not feel extremely anxious	Confident	Ok	Okay
not sure	Not sure	A great session on Cardiology	Great
-	None	Thank you.	Good
Nervous	Nervous	Still anxious	Anxiety
Nervous	Nervous	good	Good
Nervous	Nervous	m	Not sure
Nervous	Nervous		None
-	None	More confident	Confident
	None	Anxious	Anxiety
Feel like there can be improvement	Good	I feel confident	Confident
Happy to be part of it.	Confident	n/a	None
Excited	Excited	neutral	None
Good	Good	Still not great	Nervous
Anxious and not confident	Anxiety	Better	Good
Good	Good	Better	Good
not prepared	Underprepared	A bit more confident especially with cardio content, and I know what to focus my revision on	Good
	None	n/a	None
Not the best - a lot of content and hard to find concise and clear teaching	Stress	A bit better as I have an idea of what to expect	Good
Pleased to join for revision and what to bear in mind!	Good	More confident in cardiology	Confident
productive	Good	Much better	Great
Not confident	Stress	Not great	Anxiety
n/a	None	okay	Okay
Rusty on some knowledge unless I am given MCQ options	Anxiety	Really useful thank you!	Confident
Unprepared	Underprepared	Apprehensive	Apprehensive
Good	Good	A lot more confident	Confident
I didn't get the pre-session	None	a	Good
good	Good	Better	Good
n/a	None	n/a	None
relaxed at the mo - 18 months before my MLA exam	Good	not sure	Not sure
Feel more prepared for written than osces	Good	sessions like this are very helpful in boosting confidence / relieving anxiety	Good
.	None	good	Good
good	Good	GOOD	Good
anxious	Anxiety	Still stressed, lots to cover!	Stress
meh	Not sure	More confident with management and differentials and how to differentiate between	Confident
useful to orientate me on what to expect	Good	N/A	None
good	Good	good	Good
Good	Good	better	Good
n/a	None	I fell like Iâ€™m able to learn a lot	Good
beneficial	Good		None
Anxious	Anxiety	none	None
Okay	Okay	ok	Okay
Good	Good	stressed but working hard	Stress
ready to learn	Motivated	N/A	None
anxious	Anxiety	Fine thanks	Good
Good	Good	Motivated	Motivated
Amazing session full of knowledge.	Confident	Less scared	Good
Nervous	Nervous	Anxious	Anxiety
Scared	Scared	i feel slightly better then before{sorry just want to check ABPI values for critcal limb ischemia and acute limb threatening ischemia,were they swapped?i might be wrong). Thanks for the session!	Good
anxious	Anxiety	Great	Great
Hoping to improve!!	Good	Still nervous but youâ€™ve helped alot!	Nervous
Okay	Okay	Still a bit nervous but I feel better knowing how to approach cardiology revision	Nervous
Good	Good	N/a	None
n/a	None	I'm not sure yet	Not sure
nervous	Nervous	.	None
Good	Good	better	Good
a little nervy	Nervous		None
Good	Good	GOOD	Good
?	Not Sure	Okay	Okay
Scared :( and unprepared	Scared	Thought it was very beneficial	Confident
Okay	Okay	/	None
Terrified	Terrified	ok	Okay
a bit anxious	Anxiety	good	Good
Anxious	Anxiety	n/a	None
Scared	Scared	Good	Good
Nervous, unsure what the pass mark is and how this is calculated.	Nervous		None
good	Good	I feel I need to review more things	Anxiety
awsome	Good	Alright	Okay
Unsure	Not sure	Ok	Okay
nervous	Nervous	OKay	Okay
anxious	Anxiety	PERFECT	Confident
N/A	None	less nervous	Good
okay	Okay	a bit better , thank you	Good
good	Good	Neutral	None
Nervous for the UKMLA	Nervous	fine	Good
	None	Anxious but motivated	Motivated
Anxious!	Anxiety	-	None
Australian student, N/A.	None	better	Good
Not too worried as it is similar to 4th year exams	Okay	much better	Great
Excited but anxious too	Excited	Ok	Okay
revision sessions are really helpful always	Good	n/a	None
Nervous	Nervous	-	None
Okay	Okay	more confident	Confident
unprepared	Underprepared	Much better equipped	Great
Helpful	Good	Okay	Okay
-	None	-	None
Good	Good	Scared	Scared
Nervous	Nervous	better	Good
Motivated to study	Motivated	Nervous	Nervous
alright	Alright	slightly more stressed because theres alot i dont know	Stress
Goodish	Good	None, Australian student.	None
-	None	More prepared after this session	Confident
stressed	Stress	More confidence with Gastro so thank you	Confident
anxious	Anxiety	Scared	Scared
worried	Worried	still anxious	Anxiety
Better	Good	NA to me as I'm a PA student	None
Nervous	Nervous	more informed	Confident
perfect	Confident	good	Good
Scared	Scared	Feel like I'm one step closer	Confident
Good	Good	Know more than before!	Good
/	None	ok	Okay
Good	Good	AWSOME	Confident
anxious	Anxiety	A lot more confident! Thank you	Confident
Fine	Good	It was a great session! I have things to revise but I till refer to this to improve my knowledge and feel more confident	Great
Semi	Stress	scared still	Scared
unsure	Not sure	More confident with IBD	Confident
Lost	Lost	Helpful	Good
scared	Scared	-	None
unsure	Not sure	PEERFECT	Confident
N/A	None	It is alright	Good
Fine	Good	I'll be ready to do it after 3 and a half years	Confident
Okayish	Okay	A bit more confident now	Good
Absolutely terrified	Terrified	n/a	None
not great	Stress	Very useful and informative session	Good
Not sure anymore	Not sure	Better equipped to tackle the MLA	Good
Anxious	Anxiety	anxious	Anxiety
scared	Scared	Better prepared after this	Good
great, will be very useful	Great	-	None
Anxious	Anxiety	More confident!	Confident
agesss away mate	Good	Better	Good
Excited	Excited	Not nervous yet, I still have a few years!	Anxiety
anxious and unprepared	Anxiety	Ok	Okay
n.a	None	Amazing	Confident
Semi confident	Stress	nervous	Nervous
eager	Good	N/a	None
I DON'T HAVE TO TAKE IT BUT THESE PRESENTATIONS SURELY HELP THOSE WHO WILL TAKE THE EXAMS	None	Scared	Scared
Alright	Alright	Okay	Okay
n.a	None	Less scared	Good
Stressy	Stress	-	None
-	None	Good	Good
nervous	Nervous	STILL ANXIOUS	Anxiety
very underprepared	Underprepared	Anxious	Anxiety
		I find it useful	Good
		Good	Good
		Good	Good
		good, motivated, relaxed, tired	Good
		okay	Okay
		better	Good
		Not too worried, I have a few years yet!	Okay
		bit nervous	Nervous
		Nervous but have until next year	Nervous
		okay	Okay
		much better	Great
		Better	Good
		Nervous	Nervous
		OK	Okay
		better	Good
		n/a	None
		I AM NOT TAKING IT. I JUST ENJOY TO LEARN THROUGH YOUR LECTURES	Good
		Okay	Okay
		idk	Not sure
		more confident in topics discussed	Confident
		better about clinical presentations of neurology conditions	Good
		still anxious	Anxiety
		aprehensive	Apprehensive
		Better	Good
		Still scared, less than before	Scared
		U	Not sure
		well explained more demystified	Good
		more confident	Confident
		A bit more confident but still need revision	Good
		still anxious	Anxiety
		Confident	Confident
		Unsure	Not sure
		Still stressed, but the session was very informative and helpful, thank you!	Stress
		N	None
		Na	None
		okay	Okay
		Great revision!	Great
		Better	Good
		Still need more time to revise for it	Anxiety
		OK	Okay
		na	None
		more confident surrounding paeds topics	Confident
		would want to continue taking these sessions more	Good
		worried that I really don't know my paediatrics content! It was just before my exams last year so I guess my time was divided with generally revising so it didn't absorb as well. this was a very good teaching session because it made me realise all of these issues and provided really highly useful information. Thank you for this session - if you could run a third session later maybe going by age, …	Worried
		Okay	Okay
		more confident	Confident
		Unsure - still a while away	Not sure
		Love these sessions	Great

## Sheet: Analysis of free text emotions
	Pre-session		Post-session				Theme	Pre-session %	Post-session %												Theme	Pre-session (n=224) %	Post-session (n=272) %
Alright	2	0.892857	0	0			Alright	0.892857	0												Alright	0.89	0
Anxiety	31	13.8393	22	8.08824			Anxiety	13.8393	8.08824												Anxiety	13.84	8.09
Apprehensive	0	0	3	1.10294			Apprehensive	0	1.10294												Apprehensive	0	1.1
Awful	1	0.446429	0	0			Awful	0.446429	0												Awful	0.45	0
Confident	5	2.23214	39	14.3382			Confident	2.23214	14.3382												Confident	2.23	14.34
Excited	4	1.78571	0	0			Excited	1.78571	0												Excited	1.79	0
Good	45	20.0893	74	27.2059			Good	20.0893	27.2059												Good	20.09	27.21
Great	2	0.892857	13	4.77941			Great	0.892857	4.77941												Great	0.89	4.78
Lost	1	0.446429	0	0			Lost	0.446429	0												Lost	0.45	0
Motivated	2	0.892857	5	1.83824			Motivated	0.892857	1.83824												Motivated	0.89	1.84
Nervous	23	10.2679	13	4.77941			Nervous	10.2679	4.77941												Nervous	10.27	4.78
None	38	16.9643	45	16.5441			None	16.9643	16.5441												None	16.96	16.54
Not sure	12	5.35714	9	3.30882			Not sure	5.35714	3.30882												Not sure	5.36	3.31
Okay	13	5.80357	33	12.1324			Okay	5.80357	12.1324												Okay	5.8	12.13
Reassured	0	0	1	0.367647			Reassured	0	0.367647												Reassured	0	0.37
Scared	14	6.25	5	1.83824			Scared	6.25	1.83824												Scared	6.25	1.84
Stress	20	8.92857	6	2.20588			Stress	8.92857	2.20588												Stress	8.93	2.21
Terrified	2	0.892857	0	0			Terrified	0.892857	0												Terrified	0.89	0
Underprepared	5	2.23214	0	0			Underprepared	2.23214	0												Underprepared	2.23	0
Worried	4	1.78571	4	1.47059			Worried	1.78571	1.47059												Worried	1.79	1.47
	Pre-session						Post-session
Alright (0%)	0.892857					Alright (0%)	0
Anxiety (13.84%)	13.8393					Anxiety (8.09%)	8.08824
Apprehensive (0%)	0					Apprehensive (1.10%)	1.10294
Awful (0.45%)	0.446429					Awful (0%)	0
Confident (2.23%)	2.23214					Confident (14.34%)	14.3382
Excited (1.79%)	1.78571					Excited (0%)	0
Good (20.09%)	20.0893					Good (27.21%)	27.2059
Great (0.89%)	0.892857					Great (4.78%)	4.77941
Lost (0.45%)	0.446429					Lost (0%)	0
Motivated (0.89%)	0.892857					Motivated (1.84%)	1.83824
Nervous (10.27%)	10.2679					Nervous (4.78%)	4.77941
None (16.97%)	16.9643					None (16.54%)	16.5441
Not sure (5.36%)	5.35714					Not sure (3.31%)	3.30882
Okay (5.80%)	5.80357					Okay (12.13%)	12.1324
Reassured (0%)	0					Reassured (0.37%)	0.367647
Scared (6.25%)	6.25					Scared (1.84%)	1.83824
Stress (8.93%)	8.92857					Stress (2.21%)	2.20588
Terrified (0.89%)	0.892857					Terrified (0%)	0
Underprepared (2.22%)	2.23214					Underprepared (0%)	0
Worried (1.79%)	1.78571					Worried (1.47%)	1.47059

## Sheet: Knowledge Gap Themed Analysis
Pre-sessionWhat are some significant gaps you have identified in your knowledge in preparing for the UKMLA pre-session?	Pre-session Themes Analysis	Post-session What are some significant gaps you have identified in your knowledge in preparing for the UKMLA post-session?	Post-session Themes Analysis
Leukaemia	Rheumatology	5 months	All topics
Different treatments	Management	treatments for oncological emergencies	Treatment
everything	All topics	pharmacology	Pharmacology
Dermatology	Dermatology	Microbiology, dermatology	All topics
I've struggled with Rheum as I was never really taught it just bits here and there but I've been working on it in the lead up to this session to build my confidence	Rheumatology	Unsure	Unsure
not 100% confident in all rheumat presentations yet	Rheumatology	cardio	Cardiology
DDX	Diagnosis	I am not familiar with types of vasculitis and this session has prompted me to do further reading.	Cardiology
N/A	NR	N	NR
Diabetes & endocrinology & ethics	Diabetes	give me the slides the feedback form wont load properly	NR
knowing investigations	Investigations	Glaucoma	Opthalmology
I was not aware of the types of vasculitis and their presentation and management.	Management	-	NR
-	NR	AMD	Opthalmology
Ophthalmology & diabetes	Opthalmology	eye movements and eye tract lesions	Opthalmology
E	NR	-	NR
Diabetes	Diabetes	Read eat repeat	Opthalmology
-	NR	6months	All topics
Idk	Unsure	Diabetes post-insipidus	Diabetes
-	NR	Hyperparathyroidism	Endocrinology
-	NR	management of conditions	Management
endocrinology & repro stuff	Endocrinology	Just remembering everything, different Ix and gold standard Ix, and different treatment options for diff causes of conditions	All topics
NA	NR	Endocrinology	Endocrinology
Difficulties	All topics	N/a	NR
Clinical cases	All topics	GI, Nephrology, Haematology, Infective diseases	All topics
All metabolic medicine	Metabolism	Management of metabolic conditions	Metabolism
All of it	All topics	electrolyte imbalances	Metabolism
renal, haem, ophthom, surgery	All topics	-	NR
Lots of obstetrics	Obstetrics and Gynaecology		NR
-	NR	Nephritic syndromes	Renal
remembering management	Management	Initial management	Management
Gynae	Obstetrics and Gynaecology	Exam favourite topic's- this session was very useful for this	All topics
-	NR	gonorrhoea vs chlamydia	Obstetrics and Gynaecology
-	NR	probably more knowledge gap on the the management steps in oder	All topics
DDxs	Diagnosis	Knowledge of stis	Obstetrics and Gynaecology
neuro	Neurology	Trichomonas	Obstetrics and Gynaecology
Gynaecology and obstetrics	Obstetrics and Gynaecology	n/a	NR
.	NR	None	NR
Statistics, particular details in NICE guidelines (especially regarding schedules and non-medical management)	Management	N/a	NR
First line investigation and treatment for some cases	Management	M/A	NR
NICE guidelines (especially schedules, statistics and non-medical management plans)	Management	medical obstetrics, management of obstetric emergencies	Obstetrics and Gynaecology
No	NR	a bit understanding about the lesson	All topics
N/A	NR	-	NR
Management of various conditions in a stepwise way. How to differentiate between differentials	All topics	Haematology, Infectious Diseases, Anaesthesia	All topics
pregnancy complications	Obstetrics and Gynaecology	revis content	All topics
Paeds management of condition, paed rashes	Paediatrics	the presentations and conditions can be hard to match sometimes - can feel overwhelming	Diagnosis
	NR	..	NR
n.a	NR	Physiology/Science behind a lot of paediatric conditions	Physiology
N/A	NR	N/a	NR
-	NR	Peadiatric milestones/ redflags	Paediatric
everything lol	All topics	-	NR
Cardiology and paeds	All topics	Developing realistic DDxs rapidly	Diagnosis
Not sure	Unsure	A great session what to look out for on neurology condiitons	Neurology
Differentiating the organisms for the respiratory conditions	Respiratory	Types of stroke	Neurology
Developing rapid differentials under pressure	Diagnosis	Identifying strokes	Neurology
EVERYTHING CRYSTAL CLEAR	All topics	The parkinson plus syndromes and bamford classificalt	Neurology
Cardio	Cardiology	/	NR
n.a	NR	n/a	NR
[Rapid] DDxs for OSCE	Diagnosis	medication and pharmacy aspect	Pharmacology
Need to prep more	All topics	EVERYTHING WAS CLEAR	NR
Spirometery	Respiratory	I forgot all of the dementia types	Psychiatry
How to interpret question stems/rubrics and approach questions in a manner that ensures that I correctly understand the task and that I donâ€™t waste time considering irrelevant MCQ options.	All topics	n.a	NR
Key terms identified for each disease.	All topics	dont know	Unsure
N/A	NR	Spinal cord lesions	Neurology
Physiology	Physiology	Management plans	Management
DDxs	Diagnosis	I think knowledge is generally a bit low on topics from third and second year	All topics
all core conditions	All topics	Stroke	Neurology
N/A	NR	Clinical knowledge linked to anatomical knowledge	Surgery
Psychiatry topics	Psychiatry	DDxs	Diagnosis
Too many to name	All topics	Physiology	Physiology
Pharmacy	Pharmacology	need to know management plans/guidelines	Management
neurology, medications, endicrinology	All topics	Respiratory cancers and paraneoplastic syndromes, as well as conditions that I havenâ€™t encountered regularly on wards, such as pulmonary fibrosis and sarcoidosis.	Repsiratory
drugs	Pharmacology	Psych drugs	Psychiatry
n/a	NR	NO	NR
cardio	Cardiology	Unsure	Unsure
Heart sounds	Cardiology	.	NR
What it is and how it is taken	All topics	So many to talk about	All topics
ecgs, murmurs	Cardiology	SAme as before I wrote on the pre form	All topics
dermatology / question style	Dermatology	I am more familiar with the topic now	NR
Third year content- cardiology,respiratory, gastroenterology	All topics	4th year so missing gaps of content	All topics
basic sciences	Basic Science	management details	Management
Pharmacology	Pharmacology	N/A	NR
not much	NR	trying to remember the specific time frames for the conditions and their diagnosis	All topics
Need to improve management plans	Management	diagnostic criteria	Diagnosis
Endocrinology and Neurology	All topics	the psych session was amazing and comprehensive, can't think of any gaps psychiatry-wise	Psychiatry
Case studies and diagnostic approaches	Diagnosis	Pharmacy	Pharmacology
Basic Science	Basic Science	differential diagnosis	Diagnosis
surgery	Surgery	/	NR
mumurs	Cardiology	Medication	Pharmacology
heart sounds and murmurs	Cardiology	I need to recap valves and arrhythmias	Cardiology
Surgery	Surgery	valvular disease	Cardiology
No	NR	GI	Gastroenterology
biochemistry	Basic Science	Valvular diseases	Cardiology
Symptoms of each condition and causes of the condition itself	Diagnosis	Arrhythmia	Cardiology
Not really aware of the type of questions and topics that come up	All topics	-	NR
Intercalated last year so need a refresher on all content in general	All topics	Atrial Flutter	Cardiology
i havent prepared yet	All topics	Key terms of key diseases	All topics
knowing if the session scenarios or qs based	All topics	Valvular heart disease.	Cardiology
Management	Management	Cardiac murmurs and treatment	Cardiology
Murmurs and valvular pathology	Cardiology	AVNRT, AVRT	Cardiology
Cardiology	Cardiology	m	NR
Arrythmias	Cardiology		NR
-	NR	Management of valvular disease	Cardiology
	NR	Valvular disease and arrythmias are subjects I need to focus on	Cardiology
ECG	Cardiology	ECG	Cardiology
Renal and Urology	All topics	n/a	NR
The UKMLA syllabus entirely	All topics	management	Management
Heart failure	Cardiology	Specific conditions in different subjects	All topics
Differentiating between diagnoses	Diagnosis	Heart valve conditions	Cardiology
Need to better understand arrhythmias	Cardiology	Study better	All topics
Management and question type	All topics	Valve pathologies	Cardiology
N/a	NR	n/a	NR
Cancer - please a really confident and clear presenter for this! All blurs into one plus so many little details... + Haematology!	All topics	The Coronary heart disease and valvular disease	Cardiology
Key terms for specific diseases how to distinguish between very similar diseases	Diagnosis	Valvular diseases	Cardiology
OSCE skills and communication/counselling, and strokes	All topics	Valvular disease- need to make sure to review them	Cardiology
All topics	All topics	Picking out key stem words	All topics
n/a	NR	i think fine details of management or classifications etc	Management
Further reading. Knowledge is superficial	All topics	N/A	NR
Cardiology	Cardiology	Question style	All topics
Clinical subjects	All topics	Was AAA screening	Cardiology
Cardiology	Cardiology	a	NR
heart sounds and their meanings e.g. systolic murmur	Cardiology	No	NR
n/a	NR	n/a	NR
translating theory into practice - when interpreting SBAs	Cardiology	vascular disease	Cardiology
managements	Management	limited opportunities to practice - in the style required for OSCE	All topics
.	NR	N/A	NR
Drugs	Pharmacology	NOTHING	NR
pharmacology	Pharmacology	N/A	NR
all of them	All topics	Antibiotics specifics	Pharmacology
pharmacology - its so difficult ;((	Pharmacology	N/A	NR
valve disease	Cardiology	Drugs	Pharmacology
I need to work on management options for diseases	Management	cardiology	Cardiology
n/a	NR	The investigations and the correct treatments	Investigations
forgetting investigations/tests	Investigations		NR
No gaps identified as yet	NR	none	NR
ILD	Respiratory	pl	NR
Random things youve got to remember	All topics	drugs management	Pharmacology
MCQ key parts for respiratory	Respiratory	N/A	NR
2 and 3 stage questions, eg diagnosis and then management	Management	ECG changes in pericarditis and Myo	Cardiology
Acute med	Acute medicine	Clinical cases	All topics
Yeh , I have some.	All topics	Cardiology, Respiratory, Anaemia	All topics
Many	All topics	No gaps identified as yet	NR
Infectious disease	Infectious disease	It is knowing complications and investigations for certain diagnosis	All topics
memorising management	Management	Great	NR
Need to practice and go over conditions more	All topics	Valvular disease	Cardiology
Niche conditions such as pulmonary hypertension	Respiratory	I got a better understanding between acute limb, and chronic limb ischaemia which I struggled with before	Cardiology
Good	NR	N/a	NR
n/a	NR	Heart murmurs	Cardiology
not sure	Unsure	.	NR
N/a	NR	n/a	NR
n/a	NR		NR
.	NR	good	NR
just the range of knowledge necessary	All topics	Conditions not common on passmed	All topics
Obs & Gynae and Childs Health Core Conditions	Obstetrics and Gynaecology	None	NR
Cor Pulmonale	Respiratory	/	NR
Pharmacology	Pharmacology	Pharmacology	Pharmacology
it is identifying 1st line and 2nd line management of diseases as well as diagnostic tests for the medical conditions	Management	pulmonary hypertension classification	Repsiratory
Patient presentations - linking	Diagnosis	pulmonary hypertension classification	Repsiratory
Oxygen delivery	Respiratory	Pulmonary hypertension	Repsiratory
Data interpretation questions	Data Interpretation		NR
no	NR	I need to know the drugs	Pharmacology
filled some gaps	All topics	Some	NR
PE and DVT Management	Respiratory	Unknown	Unsure
specific buzz words	All topics	.	NR
differentials hard to recall	Diagnosis	NOTHING	NR
Management of conditions	Management	not knowing the treatment plans	All topics
no	NR	it was knowing complications of the diseases	All topics
gastro infections	Gastroenterology	Not sure	Unsure
Surgery	Surgery	nada	NR
	NR	N/A	NR
Pharmacology, statistics	All topics	-	NR
Australian student, N/A.	NR	anemia	Cardiology
Managements of IBD and	Management	uc/crohns	Gastroenterology
Question type	All topics	A lot	All topics
IBS treatment	Gastroenterology	n/a	NR
Important really struggling with remembering the content as I've intercalated	All topics	-	NR
Not sure	Unsure	which conditions to know	All topics
Content covered	All topics	Applying knowledge to exam questions	All topics
Discussions	Diagnosis	Renal	Renal
-	NR	-	NR
None	NR	Gatro	Gastroenterology
N/A	NR	-	NR
unsure	Unsure	Surgical emergencies	Surgery
N/A	NR	surgical, year 3 gastro content	All topics
Difference Uc v Crohns	Gastroenterology	None, Australian student.	NR
-	NR	Ischaemic mesenteric adenitis	Gastroenterology
acute abdo management	Gastroenterology	The breadth of conditions and generally well informed on the conditions covered	All topics
DDX's	Diagnosis	Long-tern conditions	All topics
the managmnt of each condition	Management	ddx	Diagnosis
Oesophageal pathologies	Gastroenterology	pharmaceutical management	Pharmacology
Investigations - need to focus more on what is first line?	Investigations	GI Cancer treatment	Gastroenterology
mallory weiss vs boerhaave was tricky but i figured it out	Gastroenterology	N/A	NR
Pharmacy	Pharmacology	Bowel obstruction	Gastroenterology
Knowing investigations, ddx and pathophysiology of presentations and conditions on mla	All topics	Surgical management	Surgery
/	NR	breadth of topics	All topics
' None	NR	NOTHING MAJOR. THANK YOU FOR THE EFFORT	NR
ethics, sociology, epidemiology,	All topics	obturator hernias	Gastroenterology
hepatitis	Gastroenterology	Knowing the anatomy	Surgery
Hepatitis	Gastroenterology	need to get more indepth info on diseases	All topics
unsure	Unsure	Surgeries	Surgery
Second line management; Understanding the actual sign behind the pathophysiology of disease - my university didn't teach this well during years 1-2 due to COVID, and then in the clinical years there is no focus on the science	Management	Discussions	Diagnosis
renal	Renal	-	NR
na	NR	EVERYTHING LINKED PERFECTLY WITH PREEXISTING KNOWLEDGE	All topics
Hepatitis	Gastroenterology	It was the Mx and Ix for the conditions	Management
Liver failure	Gastroenterology	There's a lot...	All topics
Renal	Renal	Surgical topics	Surgery
I think I'm missing a lot of basics from the COVID years so I get some simple things confused which leads onto bigger problems	All topics	n/a	NR
everything	All topics	yes	All topics
Pharmacy	Pharmacology	Need to review when to manage with mediations and when to investigate further	Pharmacology
Time scale	All topics	DDxs	Diagnosis
psych	Psychiatry	Boerhaave syndrome	Gastroenterology
key terms for diseases remembering them all	All topics	-	NR
realistic DDxs	Diagnosis	Bleeding scores	Gastroenterology
unsure	Unsure	Diagnostic investigations	Investigations
Stroke and differentiating them	Neurology	management strategies for some of the oesophageal pathologies	Management
various odd things that I must not have gone over well in year 2 and 3	All topics	.	NR
strokes - differentiating the types	Neurology	C diff.	Gastroenterology
Strokes by anatomy	Neurology	management plans	Management
identifying lesions and strokes	Neurology	N/a	NR
EVERYTHING CLEAR	All topics	N/D	NR
Neuro anatomy and application to clinical knowledge	Neurology	Gastro	Gastroenterology
n.a	NR	Pharmacy	Pharmacology
Cardiology & obstetrics	Cardiology	-	NR
-	NR	Vg	NR
too many to list	All topics	SESSION NOT CLOSELY ALIGNED TO MLA - TOO MUCH SUPERFLUOUS DETAIL	All topics
Understanding initial managements	Management	The preparation time	All topics
		I dont know	Unsure
		Interpretation	Data Interpretation
		N/A	NR
		none	NR
		questions	All topics
		n/a	NR
		proper SBA technique	All topics
		management plans	Management
		I realised I had not covered paracetamol overdose, SBP or hepatic encephalopathy well.	All topics
		obstetrics	Obstetrics and Gynaecology
		no	NR
		drug over doses	Pharmacology
		Basics still but for other areas	Basic Science
		Pharmacy	Pharmacology
		none	NR
		n/a	NR
		EVERYTHING CLEAR	NR
		Neurological conditions presentations	Neurology
		idk	NR
		n.a	NR
		neuroanatomy	Neurology
		Developing DDx's	Diagnosis
		-	NR
		MSK	Orthopaedics
		N/A	NR
		U	Unsure
		hard to figure out everything u need to know	All topics
		neuro	Neurology
		First line treatment especially cancers and the stages of cancers	Treatment
		DDX DEVELOPMENT	Diagnosis
		Anaesthesia and critical care topics	Anaesthetics
		Unsure	Unsure
		NICE guidelines (especially schedules, statistics and non-medical management plans)	All topics
		N	NR
		Management for conditions	Management
		order of investigations and management for gynaecological conditions	Management
		n.a	NR
		Kk	NR
		N/a	NR
		Syndromic conditions	All topics
		na	NR
		specific paediatric conditions	Paediatric
		Being in 3rd year i haven't learned a lot of paediatrics yet so ive got a lot of gaps	All topics
		Chromosomal abnormalities and infections. Epidemiology of paediatrics conditions.	Paediatric
		Cardiac abnormalities and their presentation and treatment	Cardiology
		paediatric genetic conditions	Paediatric
			NR
		EVERYTHING WAS CLEAR	NR

## Sheet: Knowledge Pre Themed analysis
		Thematic Analysis	Responses (n=224)			Thematic Analysis	Number of Responses	Proportion %
		Acute medicine (n=1)	Acute med			Acute Medicine (0.44%)	1	0.442478
		All Topics (n=51)	everything			All Topics (22.57%)	51	22.5664
			Difficulties			Basic Science (1.33%)	3	1.32743
			Clinical cases			Cardiology (7.96%)	18	7.9646
			All of it			Data Interpretation (0.44%)	1	0.442478
			renal, haem, ophthom, surgery			Dermatology (0.88%)	2	0.884956
			Management of various conditions in a stepwise way. How to differentiate between differentials			Diabetes (0.88%)	2	0.884956
			everything lol			Diagnosis (6.19%)	14	6.19469
			Cardiology and paeds			Endocrinology (0.44%)	1	0.442478
			EVERYTHING CRYSTAL CLEAR			Gastroenterology (4.42%)	10	4.42478
			Need to prep more			Infectious Disease (0.44%)	1	0.442478
			How to interpret question stems/rubrics and approach questions in a manner that ensures that I correctly understand the task and that I donâ€™t waste time considering irrelevant MCQ options.			Investigations (1.32%)	3	1.32743
			Key terms identified for each disease.			Management (7.96%)	18	7.9646
			all core conditions			Metabolism (0.44%)	1	0.442478
			Too many to name			Neurology (2.65%)	6	2.65487
			neurology, medications, endicrinology			None Reported (22.12%)	50	22.1239
			What it is and how it is taken			Obstetrics and Gynaecology (2.21%)	5	2.21239
			Third year content- cardiology,respiratory, gastroenterology			Opthalmology (0.44%)	1	0.442478
			Endocrinology and Neurology			Paediatrics (0.44%)	1	0.442478
			Not really aware of the type of questions and topics that come up			Pharmacology (3.98%)	9	3.9823
			Intercalated last year so need a refresher on all content in general			Physiology (0.44%)	1	0.442478
			i havent prepared yet			Psychiatry (0.88%)	2	0.884956
			knowing if the session scenarios or qs based			Renal (0.88%)	2	0.884956
			Renal and Urology			Respiratory (3.54%)	8	3.53982
			The UKMLA syllabus entirely			Rheumatology (1.33%)	3	1.32743
			Management and question type			Surgery (1.33%)	3	1.32743
			Cancer - please a really confident and clear presenter for this! All blurs into one plus so many little details... + Haematology!			Unsure (3.54%)	8	3.53982
			OSCE skills and communication/counselling, and strokes			Total	225
			All topics
			Further reading. Knowledge is superficial
			Clinical subjects
			all of them										Thematic Analysis	Pre Session	Proportion %	Post Session	Proportion %	All topics (17.28%)	47	17.2794
			Random things youve got to remember										Acute Medicine (0.44%)	1	0.442478	0	0	Anaesthetics (0.37%)	1	0.367647
			Yeh , I have some.										All Topics (22.57%)	51	22.5664	47	17.2794	Basic Science (0.37%)	1	0.367647
			Many										Basic Science (1.33%)	3	1.32743			Cardiology (9.93%)	27	9.92647
			Need to practice and go over conditions more										Cardiology (7.96%)	18	7.9646			Data Interpretation (0.37%)	1	0.367647
			just the range of knowledge necessary										Data Interpretation (0.44%)	1	0.442478			Diabetes (0.37%)	1	0.367647
			filled some gaps										Dermatology (0.88%)	2	0.884956			Diagnosis (3.68%)	10	3.67647
			specific buzz words										Diabetes (1.33%)	3	1.32743			Endocrinology (0.74%)	2	0.735294
			Pharmacology, statistics										Diagnosis (6.19%)	14	6.19469			Gastroenterology (4.044%)	11	4.04412
			Question type										Endocrinology (0.44%)	1	0.442478			Investigations (0.74%)	2	0.735294
			Important really struggling with remembering the content as I've intercalated										Gastroenterology (4.42%)	10	4.42478			Management (4.78%)	13	4.77941
			Content covered										Infectious Disease (0.44%)	1	0.442478			Metabolism (0.74%)	2	0.735294
			Knowing investigations, ddx and pathophysiology of presentations and conditions on mla										Investigations (1.32%)	3	1.32743			Neurology (3.31%)	9	3.30882
			ethics, sociology, epidemiology,										Management (7.96%)	18	7.9646			None Reported (33.09%)	90	33.0882
			I think I'm missing a lot of basics from the COVID years so I get some simple things confused which leads onto bigger problems										Metabolism (0.44%)	1	0.442478			Obstetrics and Gynaecology (1.84%)	5	1.83824
			everything										Neurology (2.65%)	6	2.65487			Opthalmology (1.47%)	4	1.47059
			Time scale										None Reported (22.57%)	51	22.5664			Orthopaedics (0.37%)	1	0.367647
			key terms for diseases remembering them all										Obstetrics and Gynaecology (2.21%)	5	2.21239			Paediatric (1.47%)	4	1.47059
			various odd things that I must not have gone over well in year 2 and 3										Paediatrics (0.44%)	1	0.442478			Pharmacology (5.15%)	14	5.14706
			EVERYTHING CLEAR										Pharmacology (3.98%)	9	3.9823			Physiology (0.74%)	2	0.735294
			too many to list										Physiology (0.44%)	1	0.442478			Psychiatry (1.10%)	3	1.10294
		Basic Science (n=3)	basic sciences										Psychiatry (0.88%)	2	0.884956			Renal (0.74%)	2	0.735294
			Basic Science										Renal (0.88%)	2	0.884956			Respiratory (1.47%)	4	1.47059
			biochemistry										Respiratory (3.54%)	8	3.53982			Surgery (2.21%)	6	2.20588
		Cardiology (n=18)	Cardio										Rheumatology (1.33%)	3	1.32743			Treatment (0.74%)	2	0.735294
			cardio										Surgery (1.33%)	3	1.32743			Unsure (2.94%)	8	2.94118
			Heart sounds										Unsure (3.54%)	8	3.53982
			ecgs, murmurs										Total	226
			mumurs
			heart sounds and murmurs
			Murmurs and valvular pathology
			Cardiology
			Arrythmias
			ECG
			Heart failure
			Need to better understand arrhythmias
			Cardiology
			Cardiology
			heart sounds and their meanings e.g. systolic murmur
			translating theory into practice - when interpreting SBAs
			valve disease
			Cardiology & obstetrics
		Data Interpretation (n=1)	Data interpretation questions
		Dermatology (n=2)	Dermatology
			dermatology / question style
		Diabetes (n=2)	Diabetes & endocrinology & ethics
			Diabetes
		Diagnosis (n=14)	DDX
			DDxs
			Developing rapid differentials under pressure
			[Rapid] DDxs for OSCE
			DDxs
			Case studies and diagnostic approaches
			Symptoms of each condition and causes of the condition itself
			Differentiating between diagnoses
			Key terms for specific diseases how to distinguish between very similar diseases
			Patient presentations - linking
			differentials hard to recall
			Discussions
			DDX's
			realistic DDxs
		Endocrinology (n=1)	endocrinology & repro stuff
		Gastroenterology (n=10)	gastro infections
			IBS treatment
			Difference Uc v Crohns
			acute abdo management
			Oesophageal pathologies
			mallory weiss vs boerhaave was tricky but i figured it out
			hepatitis
			Hepatitis
			Hepatitis
			Liver failure
		Infectious Disease (n=1)	Infectious disease
		Investigations (n=3)	knowing investigations
			forgetting investigations/tests
			Investigations - need to focus more on what is first line?
		Management (n=18)	Different treatments
			I was not aware of the types of vasculitis and their presentation and management.
			remembering management
			Statistics, particular details in NICE guidelines (especially regarding schedules and non-medical management)
			First line investigation and treatment for some cases
			NICE guidelines (especially schedules, statistics and non-medical management plans)
			Need to improve management plans
			Management
			managements
			I need to work on management options for diseases
			2 and 3 stage questions, eg diagnosis and then management
			memorising management
			it is identifying 1st line and 2nd line management of diseases as well as diagnostic tests for the medical conditions
			Management of conditions
			Managements of IBD and
			the managmnt of each condition
			Second line management; Understanding the actual sign behind the pathophysiology of disease - my university didn't teach this well during years 1-2 due to COVID, and then in the clinical years there is no focus on the science
			Understanding initial managements
		Metabolism (n=1)	All metabolic medicine
		Neurology (n=6)	neuro
			Stroke and differentiating them
			strokes - differentiating the types
			Strokes by anatomy
			identifying lesions and strokes
			Neuro anatomy and application to clinical knowledge
		None Reported (n=50)	N/A
			-
			-
			-
			E
			-
			NA
			-
			-
			-
			.
			No
			N/A
			-
			n.a
			N/A
			-
			n.a
			N/A
			N/A
			n/a
			not much
			No
			-
			-
			N/a
			n/a
			n/a
			.
			n/a
			No gaps identified as yet
			Good
			n/a
			N/a
			n/a
			.
			no
			no
			-
			Australian student, N/A.
			-
			None
			N/A
			N/A
			-
			/
			' None
			na
			n.a
			-
		Obstetrics and Gynaecology (n=5)	Lots of obstetrics
			Gynae
			Gynaecology and obstetrics
			pregnancy complications
			Obs & Gynae and Childs Health Core Conditions
		Opthalmology (n=1)	Opthalmology
		Paediatrics (n=1)	Paeds management of condition, paed rashes
		Pharmacology (n=9)	Pharmacy
			drugs
			Pharmacology
			Drugs
			pharmacology
			pharmacology - its so difficult ;((
			Pharmacology
			Pharmacy
			Pharmacy
		Physiology (n=1)	Physiology
		Psychiatry (n=2)	Psychiatry topics
			psych
		Renal (n=2)	renal
			Renal
		Respiratory (n=8)	Differentiating the organisms for the respiratory conditions
			Spirometery
			ILD
			MCQ key parts for respiratory
			Niche conditions such as pulmonary hypertension
			Cor Pulmonale
			Oxygen delivery
			PE and DVT Management
		Rheumatology (n=3)	Leukaemia
			I've struggled with Rheum as I was never really taught it just bits here and there but I've been working on it in the lead up to this session to build my confidence
			not 100% confident in all rheumat presentations yet
		Surgery (n=3)	surgery
			Surgery
			Surgery
		Unsure (n=7)	Idk
			Not sure
			not sure
			Not sure
			unsure
			unsure
			unsure

## Sheet: Knowledge Post Thematic A
	Thematic Analysis	Responses (n=272)
	All Topics (n=47)	5 months
		Microbiology, dermatology		Thematic Analysis	Responses	Proportion %
		6months		All topics (17.28%)	47	17.2794
		Just remembering everything, different Ix and gold standard Ix, and different treatment options for diff causes of conditions		Anaesthetics (0.37%)	1	0.367647
		GI, Nephrology, Haematology, Infective diseases		Basic Science (0.37%)	1	0.367647
		Exam favourite topic's- this session was very useful for this		Cardiology (9.93%)	27	9.92647
		probably more knowledge gap on the the management steps in oder		Data Interpretation (0.37%)	1	0.367647
		a bit understanding about the lesson		Diabetes (0.37%)	1	0.367647
		Haematology, Infectious Diseases, Anaesthesia		Diagnosis (3.68%)	10	3.67647
		revis content		Endocrinology (0.74%)	2	0.735294
		I think knowledge is generally a bit low on topics from third and second year		Gastroenterology (4.044%)	11	4.04412
		So many to talk about		Investigations (0.74%)	2	0.735294
		SAme as before I wrote on the pre form		Management (4.78%)	13	4.77941
		4th year so missing gaps of content		Metabolism (0.74%)	2	0.735294
		trying to remember the specific time frames for the conditions and their diagnosis		Neurology (3.31%)	9	3.30882
		Key terms of key diseases		None Reported (33.09%)	90	33.0882
		Specific conditions in different subjects		Obstetrics and Gynaecology (1.84%)	5	1.83824
		Study better		Opthalmology (1.47%)	4	1.47059
		Picking out key stem words		Orthopaedics (0.37%)	1	0.367647
		Question style		Paediatric (1.47%)	4	1.47059
		limited opportunities to practice - in the style required for OSCE		Pharmacology (5.15%)	14	5.14706
		Clinical cases		Physiology (0.74%)	2	0.735294
		Cardiology, Respiratory, Anaemia		Psychiatry (1.10%)	3	1.10294
		It is knowing complications and investigations for certain diagnosis		Renal (0.74%)	2	0.735294
		Conditions not common on passmed		Respiratory (1.47%)	4	1.47059
		not knowing the treatment plans		Surgery (2.21%)	6	2.20588
		it was knowing complications of the diseases		Treatment (0.74%)	2	0.735294
		A lot		Unsure (2.94%)	8	2.94118
		which conditions to know		Total	272
		Applying knowledge to exam questions
		surgical, year 3 gastro content
		The breadth of conditions and generally well informed on the conditions covered
		Long-tern conditions
		breadth of topics
		need to get more indepth info on diseases
		EVERYTHING LINKED PERFECTLY WITH PREEXISTING KNOWLEDGE
		There's a lot...
		yes
		SESSION NOT CLOSELY ALIGNED TO MLA - TOO MUCH SUPERFLUOUS DETAIL
		The preparation time
		questions
		proper SBA technique
		I realised I had not covered paracetamol overdose, SBP or hepatic encephalopathy well.
		hard to figure out everything u need to know
		NICE guidelines (especially schedules, statistics and non-medical management plans)
		Syndromic conditions
		Being in 3rd year i haven't learned a lot of paediatrics yet so ive got a lot of gaps
	Anaesthetics (n=1)	Anaesthesia and critical care topics
	Basic Science (n=1)	Basics still but for other areas
	Cardiology (n=27)	cardio
		I am not familiar with types of vasculitis and this session has prompted me to do further reading.
		I need to recap valves and arrhythmias
		valvular disease
		Valvular diseases
		Arrhythmia
		Atrial Flutter
		Valvular heart disease.
		Cardiac murmurs and treatment
		AVNRT, AVRT
		Management of valvular disease
		Valvular disease and arrythmias are subjects I need to focus on
		ECG
		Heart valve conditions
		Valve pathologies
		The Coronary heart disease and valvular disease
		Valvular diseases
		Valvular disease- need to make sure to review them
		Was AAA screening
		vascular disease
		cardiology
		ECG changes in pericarditis and Myo
		Valvular disease
		I got a better understanding between acute limb, and chronic limb ischaemia which I struggled with before
		Heart murmurs
		anemia
		Cardiac abnormalities and their presentation and treatment
	Data Interpretation (n=1)	Interpretation
	Diabetes (n=1)	Diabetes post-insipidus
	Diagnosis (n=10)	the presentations and conditions can be hard to match sometimes - can feel overwhelming
		Developing realistic DDxs rapidly
		DDxs
		diagnostic criteria
		differential diagnosis
		ddx
		Discussions
		DDxs
		Developing DDx's
		DDX DEVELOPMENT
	Endocrinology (n=2)	Hyperparathyroidism
		Endocrinology
	Gastroenterology (n=11)	GI
		uc/crohns
		Gatro
		Ischaemic mesenteric adenitis
		GI Cancer treatment
		Bowel obstruction
		obturator hernias
		Boerhaave syndrome
		Bleeding scores
		C diff.
		Gastro
	Investigations (n=2)	The investigations and the correct treatments
		Diagnostic investigations
	Management (n=13)	management of conditions
		Initial management
		Management plans
		need to know management plans/guidelines
		management details
		management
		i think fine details of management or classifications etc
		It was the Mx and Ix for the conditions
		management strategies for some of the oesophageal pathologies
		management plans
		management plans
		Management for conditions
		order of investigations and management for gynaecological conditions
	Metabolism (n=2)	Management of metabolic conditions
		electrolyte imbalances
	Neurology (n=9)	A great session what to look out for on neurology condiitons
		Types of stroke
		Identifying strokes
		The parkinson plus syndromes and bamford classificalt
		Spinal cord lesions
		Stroke
		Neurological conditions presentations
		neuroanatomy
		neuro
	None Reported (n=90)	N
		give me the slides the feedback form wont load properly
		-
		-
		N/a
		-
		n/a
		None
		N/a
		M/A
		-
		..
		N/a
		-
		/
		n/a
		EVERYTHING WAS CLEAR
		n.a
		NO
		.
		I am more familiar with the topic now
		N/A
		/
		-
		m
		n/a
		n/a
		N/A
		a
		No
		n/a
		N/A
		NOTHING
		N/A
		N/A
		none
		pl
		N/A
		No gaps identified as yet
		Great
		N/a
		.
		n/a
		good
		None
		/
		Some
		.
		NOTHING
		nada
		N/A
		-
		n/a
		-
		-
		-
		None, Australian student.
		N/A
		NOTHING MAJOR. THANK YOU FOR THE EFFORT
		-
		n/a
		-
		.
		N/a
		N/D
		-
		Vg
		N/A
		none
		n/a
		no
		none
		n/a
		EVERYTHING CLEAR
		idk
		n.a
		-
		N/A
		N
		n.a
		Kk
		N/a
		na
		EVERYTHING WAS CLEAR
	Obstetrics and Gynaecology (n=5)	gonorrhoea vs chlamydia
		Knowledge of stis
		Trichomonas
		medical obstetrics, management of obstetric emergencies
		obstetrics
	Opthalmology (n=4)	Glaucoma
		AMD
		eye movements and eye tract lesions
		Read eat repeat
	Orthopaedics (n=1)	MSK
	Paediatric (n=4)	specific paediatric conditions
		Chromosomal abnormalities and infections. Epidemiology of paediatrics conditions.
		paediatric genetic conditions
		Peadiatric milestones/ redflags
	Pharmacology (n=14)	pharmacology
		medication and pharmacy aspect
		Pharmacy
		Medication
		Antibiotics specifics
		Drugs
		drugs management
		Pharmacology
		I need to know the drugs
		pharmaceutical management
		Need to review when to manage with mediations and when to investigate further
		Pharmacy
		drug over doses
		Pharmacy
	Physiology (n=2)	Physiology/Science behind a lot of paediatric conditions
		Physiology
	Psychiatry (n=3)	I forgot all of the dementia types
		Psych drugs
		the psych session was amazing and comprehensive, can't think of any gaps psychiatry-wise
	Renal (n=2)	Nephritic syndromes
		Renal
	Respiratory (n=4)	Respiratory cancers and paraneoplastic syndromes, as well as conditions that I havenâ€™t encountered regularly on wards, such as pulmonary fibrosis and sarcoidosis.
		pulmonary hypertension classification
		pulmonary hypertension classification
		Pulmonary hypertension
	Surgery (n=6)	Clinical knowledge linked to anatomical knowledge
		Surgical emergencies
		Surgical management
		Knowing the anatomy
		Surgeries
		Surgical topics
	Treatment (n=2)	treatments for oncological emergencies
		First line treatment especially cancers and the stages of cancers
	Unsure (n=8)	Unsure
		dont know
		Unsure
		Unknown
		Not sure
		I dont know
		U
		Unsure

[truncated: 57 more sheets: Overall Knowledge Thematic A, Pre Paediatrics 2, Post Paediatrics 1, Pre Medical Ethics, Post Medical Ethics, Pre Breast, Post Breast , Pre Haematology 2,  Post Haematology 2, Pre Haematology 1, Post Haematology 1, Pre Oncology, Post Oncology, Pre Dermatology, Post Dermatology, Pre Rheumatology 2, Post Rheumatology 2, Pre Rheumatology 1, Post Rheumatology 1, Pre Opthalmology …]
